# Supplementary material for: Reconstruction of submarine eruption processes from FTIR volatile analysis of marine tephra: Example of Oomurodashi volcano, Japan
Source: Frontiers journal article supplement (doi:10.3389/feart.2022.963392), 2022-12-13
Supplement: Data_Sheet_2.xlsx [file Data_Sheet_2.xlsx]

## Sheet: 0-63 data
													Avg H2Om wt% (all)	Avg OH wt% (all)	Avg H2Ot wt% (all)
													1.42111	0.436071	1.85718
													stdev H2Om (all)	stdev OH (all)	stdev H2Ot (all)
													0.463813	0.172561	0.579969
													Conventional method	Species dependent ε3500 method			Conventional method 1630 & 3500 bands
													Newman et al 1986	Newman et al 1986 values			Fixed ε3500 values from literature					Fixed ε3500 OH-by-difference
													ε1630	ε3500OH	ε3500H2Om		Okumura	Ihinger	Dobson	Hauri	Aubaud	Okumura	Ihinger	Dobson	Hauri	Aubaud
													55	100	56		75	80	88	90	95	75	80	88	90	95
					From reflectance		Peak Positions		Measured absorbances		Normalised absorbances (1/cm)																	3500 H2Ot baseline positions		1630 H2Om baseline positions
Data set	Shard	Row	Col	Density (g/L)	Thickness (µm)	Thickness (cm)	1630 H2Om	3500 H2Ot	1630 H2Om	3500 H2Ot	Norm 1630 H2Om	Norm 3500 H2Ot	H2Om wt% (1630)	Calc OH wt%	Calc H2Ot wt%	Calc ε3500	H2Ot wt%	H2Ot wt%	H2Ot wt%	H2Ot wt%	H2Ot wt%	OH wt%	OH wt%	OH wt%	OH wt%	OH wt%		left	right	left	right	*indicates flexicurve baseline used for 1630 H2Om peak
0-63 micron size fraction
	a	31	33	2381	24.4021	0.00244021	1628	3570	0.27	0.429	110.646	175.804	1.52254	0.477908	2.00045	66.5116	1.77404	1.66316	1.51197	1.47837	1.40056	0.251501	0.140623	-0.0105732	-0.0441724	-0.121981		3930	2589	1695	1559
		29	33	2381	23.9808	0.00239808	1628	3570	0.24	0.378	100.08	157.626	1.37715	0.421751	1.7989	66.3158	1.5906	1.49119	1.35563	1.3255	1.25574	0.213458	0.114045	-0.0215179	-0.051643	-0.121406		3930	2589	1696	1551
		28	34	2381	23.31	0.002331	1628	3570	0.198	0.338	84.942	145.002	1.16884	0.442861	1.6117	68.0902	1.46321	1.37176	1.24706	1.21935	1.15517	0.294375	0.202924	0.0782178	0.0505054	-0.0136706		3868	2700	1696	1562
		26	31	2381	21.7865	0.00217865	1628	3570	0.217	0.344	99.603	157.896	1.37058	0.42747	1.79805	66.4606	1.59333	1.49375	1.35795	1.32777	1.25789	0.222746	0.123163	-0.0126321	-0.0428088	-0.112692		3930	2589	1694	1545
		25	31	2381	22.4467	0.00224467	1628	3570	0.221	0.348	98.4555	155.034	1.35479	0.414652	1.76944	66.311	1.56445	1.46667	1.33334	1.30371	1.23509	0.209656	0.111878	-0.021456	-0.0510857	-0.119702		3930	2589	1696	1547
		24	31	2381	23.0282	0.00230282	1628	3570	0.229	0.364	99.4432	158.067	1.36838	0.429995	1.79838	66.5205	1.59505	1.49536	1.35942	1.32921	1.25925	0.22667	0.126979	-0.00896321	-0.0391726	-0.109131		3930	2589	1695	1545
		23	35	2381	25.1762	0.00251762	1628	3570	0.182	0.327	72.2904	129.884	0.994749	0.425938	1.42069	69.1917	1.31066	1.22875	1.11704	1.09222	1.03473	0.315915	0.233998	0.122294	0.0974708	0.0399856		3930	2664	1694	1561
		23	33	2381	25.2143	0.00252143	1628	3570	0.245	0.422	97.167	167.365	1.33706	0.517907	1.85497	68.2848	1.68888	1.58333	1.43939	1.4074	1.33333	0.35182	0.246265	0.102326	0.0703398	-0.00373401		3930	2589	1705	1559
		22	34	2381	25.0627	0.00250627	1628	3570	0.24	0.401	95.76	159.999	1.3177	0.473	1.7907	67.6223	1.61455	1.51364	1.37604	1.34546	1.27464	0.296849	0.195939	0.0583357	0.0277571	-0.0430565		3930	2661	1708	1551
		33	35	2381	23.3427	0.00233427	1628	3570	0.254	0.401	108.814	171.788	1.49732	0.461636	1.95896	66.3688	1.73352	1.62517	1.47743	1.4446	1.36857	0.236192	0.127847	-0.0198955	-0.0527273	-0.128759		3930	2589	1714	1544
	c-RH	31	43	2381	15.186	0.0015186	1628	3570	0.123	0.18	80.9955	118.53	1.11453	0.272925	1.38746	64.6552	1.19609	1.12133	1.01939	0.996738	0.944278	0.0815513	0.00679594	-0.0951432	-0.117796	-0.170256		3930	2589	1714	1563
		31	42	2381	15.1688	0.00151688	1628	3570	0.123	0.188	81.0877	123.939	1.1158	0.313151	1.42895	65.6425	1.25067	1.1725	1.06591	1.04222	0.98737	0.134864	0.0566974	-0.0498937	-0.0735806	-0.128434		3930	2589	1695	1545
		31	41	2381	15.2555	0.00152555	1628	3570	0.124	0.187	81.282	122.578	1.11848	0.301357	1.41983	65.3389	1.23694	1.15963	1.05421	1.03078	0.976531	0.118462	0.0411536	-0.0642673	-0.0876942	-0.141946		3930	2589	1713	1546
		31	40	2381	15.2381	0.00152381	1628	3570	0.119	0.197	78.0938	129.281	1.07461	0.376654	1.45126	67.4196	1.30458	1.22304	1.11186	1.08715	1.02993	0.229972	0.148436	0.03725	0.0125421	-0.0446762		3897	2589	1696	1544
		30	41	2381	14.7984	0.00147984	1628	3570	0.11	0.181	74.3325	122.311	1.02285	0.352883	1.37573	67.2862	1.23424	1.1571	1.05191	1.02853	0.974398	0.211389	0.134249	0.0290582	0.00568249	-0.0484507		3951	2589	1731	1545
		30	42	2381	14.9981	0.00149981	1628	3570	0.112	0.161	74.676	107.347	1.02758	0.236985	1.26456	64.2458	1.08324	1.01553	0.923212	0.902697	0.855186	0.0556603	-0.0120419	-0.104363	-0.124879	-0.172389		3956	2589	1729	1546
		30	43	2381	14.9477	0.00149477	1628	3570	0.106	0.179	70.914	119.751	0.975809	0.359852	1.33566	67.8544	1.20841	1.13288	1.02989	1.00701	0.954006	0.232598	0.157073	0.0540837	0.0311972	-0.0218031		3923	2589	1713	1545
		29	44	2381	15.1976	0.00151976	1628	3570	0.085	0.12	55.93	78.96	0.769622	0.166601	0.936223	63.8298	0.796785	0.746986	0.679078	0.663988	0.629041	0.0271631	-0.0226359	-0.0905438	-0.105634	-0.140581		3930	2589	1707	1557
		29	42	2381	14.9645	0.00149645	1628	3570	0.084	0.128	56.133	85.536	0.772415	0.214805	0.987221	65.5738	0.863144	0.809197	0.735634	0.719286	0.681429	0.0907282	0.0367817	-0.0367817	-0.0531291	-0.0909863		3925	2631	1705	1573
		37	36	2381	17.7069	0.00177069	1628	3570	0.179	0.295	101.09	166.601	1.39105	0.481893	1.87294	67.3209	1.68117	1.5761	1.43282	1.40098	1.32724	0.290125	0.185052	0.0417703	0.00992989	-0.0638058		3930	2589	1695	1546
	c-LH	22	10	2381	7.10732	0.000710732	1628	3570	0.112	0.178	157.584	250.446	2.16843	0.681118	2.84955	66.5172	2.52725	2.3693	2.15391	2.10604	1.9952	0.358823	0.20087	-0.0145207	-0.0623853	-0.17323		3991	2523	1695	1547
		21	10	2381	7.04722	0.000704722	1627	3570	0.118	0.169	167.442	239.811	2.30408	0.524666	2.82874	64.161	2.41993	2.26869	2.06244	2.01661	1.91047	0.115855	-0.035391	-0.241635	-0.287467	-0.393605		4027	2589	1705	1546
		20	10	2381	7.34214	0.000734214	1628	3570	0.115	0.165	156.63	224.73	2.1553	0.493845	2.64914	64.2023	2.26775	2.12602	1.93274	1.88979	1.79033	0.11245	-0.029284	-0.222558	-0.265508	-0.364971		3729	2652	1695	1547
		20	11	2381	7.54148	0.000754148	1628	3570	0.117	0.156	155.142	206.856	2.13482	0.370036	2.50486	62.5	2.08738	1.95692	1.77902	1.73949	1.64793	-0.0474405	-0.177902	-0.355804	-0.395338	-0.48689		3789	2547	1694	1568	*
		19	11	2381	7.61905	0.000761905	1627	3570	0.118	0.159	154.875	208.688	2.13115	0.385955	2.5171	62.7466	2.10587	1.97425	1.79477	1.75489	1.66253	-0.0252848	-0.156901	-0.336379	-0.376262	-0.468625		3769	2560	1695	1546
		18	11	2381	8.05153	0.000805153	1626	3570	0.109	0.153	135.378	190.026	1.86286	0.394961	2.25782	63.6969	1.91755	1.79771	1.63428	1.59796	1.51386	0.0546895	-0.0651575	-0.228585	-0.264902	-0.349006		3787	2589	1695	1563
		19	10	2381	7.45712	0.000745712	1626	3570	0.113	0.16	151.533	214.56	2.08516	0.456152	2.54131	63.8978	2.16512	2.0298	1.84528	1.80427	1.70931	0.079962	-0.0553583	-0.239886	-0.280892	-0.375854		3820	2589	1696	1547
		17	11	2381	9.5511	0.00095511	1625	3570	0.099	0.145	103.653	151.815	1.42631	0.350239	1.77655	64.6744	1.53196	1.43622	1.30565	1.27664	1.20945	0.105653	0.00990495	-0.12066	-0.149675	-0.216866		3930	2669	1682	1546
	d	27	32	2381	8.66927	0.000866927	1627	3570	0.134	0.192	154.569	221.472	2.12694	0.485069	2.61201	64.1711	2.23487	2.09519	1.90472	1.86239	1.76437	0.107934	-0.0317454	-0.222218	-0.264545	-0.362565		3839	2589	1695	1545
		27	31	2381	9.18274	0.000918274	1627	3570	0.126	0.178	137.214	193.842	1.88813	0.409694	2.29782	63.8451	1.95606	1.83381	1.6671	1.63005	1.54426	0.0679326	-0.0543211	-0.221031	-0.258077	-0.343869		3833	2589	1695	1545
		26	31	2381	9.2081	0.00092081	1626	3570	0.116	0.159	125.976	172.674	1.73349	0.336087	2.06957	63.1454	1.74245	1.63355	1.48505	1.45204	1.37562	0.00896631	-0.099937	-0.248442	-0.281443	-0.357866		3815	2589	1695	1545
		26	33	2381	8.80669	0.000880669	1626	3570	0.126	0.163	143.073	185.087	1.96875	0.298281	2.26703	61.7892	1.86771	1.75098	1.5918	1.55642	1.47451	-0.101042	-0.217773	-0.376953	-0.412326	-0.494243		3930	2589	1694	1554
		25	31	2381	9.2081	0.00092081	1627	3570	0.083	0.086	90.138	93.396	1.24034	0.012254	1.25259	56.4304	0.942459	0.883555	0.803232	0.785382	0.744046	-0.297881	-0.356784	-0.437108	-0.454957	-0.496293		3736	2589	1694	1546
		30	34	2381	12.87	0.001287	1628	3570	0.168	0.233	130.536	181.041	1.79623	0.364272	2.16051	63.4186	1.82688	1.7127	1.557	1.5224	1.44228	0.03065	-0.0835302	-0.239231	-0.273831	-0.353957		3851	2497	1695	1546
		26	32	2381	8.63558	0.000863558	1627	3570	0.117	0.165	135.486	191.07	1.86435	0.40203	2.26638	63.8051	1.92809	1.80758	1.64326	1.60674	1.52217	0.0637384	-0.056767	-0.221093	-0.257609	-0.342175		3821	2658	1695	1546
		25	32	2381	9.10747	0.000910747	1627	3570	0.095	0.114	104.31	125.172	1.43535	0.143535	1.57889	60	1.26311	1.18417	1.07651	1.05259	0.997192	-0.172242	-0.251187	-0.358838	-0.382761	-0.43816		3759	2647	1694	1546
	e	28	33	2381	18.859	0.0018859	1628	3570	0.202	0.306	107.111	162.256	1.47389	0.40262	1.87651	65.4405	1.63733	1.535	1.39545	1.36444	1.29263	0.163441	0.061108	-0.0784372	-0.109447	-0.18126		3881	2678	1695	1545
		26	26	2381	19.2678	0.00192678	1628	3570	0.245	0.439	127.155	227.841	1.74971	0.74452	2.49423	69.1339	2.29914	2.15545	1.9595	1.91595	1.81511	0.549433	0.405736	0.209787	0.166242	0.0654027		3930	2601	1698	1558
		25	26	2381	20.4918	0.00204918	1627	3570	0.249	0.443	121.512	216.184	1.67206	0.699781	2.37184	68.9816	2.18151	2.04517	1.85924	1.81793	1.72225	0.509452	0.373108	0.187183	0.145867	0.0501865		3930	2589	1695	1550
		25	25	2381	20.9205	0.00209205	1628	3570	0.195	0.404	93.21	193.112	1.28261	0.743257	2.02587	72.1429	1.94869	1.8269	1.66082	1.62391	1.53844	0.666081	0.544288	0.378206	0.341299	0.25583		3930	2589	1694	1550
		24	25	2381	20.2429	0.00202429	1628	3570	0.207	0.409	102.258	202.046	1.40712	0.741149	2.14827	71.18	2.03885	1.91142	1.73765	1.69904	1.60962	0.63173	0.504302	0.330536	0.291922	0.202499		3915	2617	1694	1566
		23	25	2381	21.5517	0.00215517	1628	3570	0.214	0.398	99.296	184.672	1.36636	0.632483	1.99884	69.9227	1.86352	1.74705	1.58823	1.55294	1.4712	0.497167	0.380697	0.221874	0.186579	0.104846		3908	2589	1695	1563
		22	25	2381	20.9205	0.00209205	1628	3570	0.2	0.344	95.6	164.432	1.3155	0.507783	1.82328	68.254	1.65928	1.55558	1.41416	1.38274	1.30996	0.343784	0.240079	0.0986624	0.0672366	-0.00553894		3930	2589	1694	1561
		31	28	2381	20.5761	0.00205761	1628	3570	0.247	0.387	120.042	188.082	1.65183	0.498425	2.15026	66.1991	1.89794	1.77931	1.61756	1.58161	1.49837	0.246103	0.127482	-0.0342738	-0.0702196	-0.153462		3930	2589	1696	1566
		32	29	2381	19.8177	0.00198177	1628	3570	0.248	0.373	125.141	188.216	1.72199	0.460147	2.18214	65.2783	1.89929	1.78058	1.61871	1.58274	1.49944	0.177291	0.058586	-0.103285	-0.139256	-0.222558		3786	2589	1694	1567
		35	33	2381	17.7541	0.00177541	1628	3570	0.158	0.216	88.9935	121.662	1.22459	0.234997	1.45959	63.0841	1.22769	1.15096	1.04633	1.02308	0.96923	0.00310023	-0.0736305	-0.178263	-0.201515	-0.255361		3813	2589	1695	1545
	f	31	28	2381	14.6199	0.00146199	1628	3570	0.192	0.289	131.328	197.676	1.80713	0.484067	2.2912	65.296	1.99475	1.87008	1.70007	1.66229	1.5748	0.187616	0.0629437	-0.107063	-0.144843	-0.232331		3910	2589	1694	1564
		31	27	2381	16.3399	0.00163399	1628	3570	0.177	0.275	108.324	168.3	1.49059	0.439007	1.92959	66.0106	1.69831	1.59217	1.44743	1.41526	1.34077	0.207728	0.101583	-0.0431597	-0.0753247	-0.149812		3915	2744	1694	1564
		30	27	2381	16.7785	0.00167785	1628	3570	0.198	0.321	118.008	191.316	1.62384	0.538575	2.16242	66.9587	1.93057	1.80991	1.64537	1.60881	1.52413	0.306726	0.186065	0.0215282	-0.0150356	-0.0997097		3930	2589	1693	1565
		29	27	2381	15.4083	0.00154083	1628	3570	0.202	0.316	131.098	205.084	1.80397	0.541905	2.34587	66.1642	2.0695	1.94016	1.76378	1.72459	1.63382	0.265535	0.136191	-0.0401874	-0.0793825	-0.17015		3930	2589	1694	1457
		28	25	2381	13.5685	0.00135685	1627	3570	0.166	0.244	122.342	179.828	1.68348	0.418234	2.10171	64.7558	1.81464	1.70123	1.54657	1.5122	1.43261	0.131163	0.0177475	-0.13691	-0.171278	-0.250868		3825	2589	1695	1567
		28	28	2381	16	0.0016	1628	3570	0.195	0.276	121.875	172.5	1.67706	0.366372	2.04343	63.8889	1.7407	1.6319	1.48355	1.45058	1.37423	0.0636421	-0.0451515	-0.193506	-0.226474	-0.30282		3930	2589	1696	1565
		26	31	2381	16.1031	0.00161031	1628	3570	0.089	0.082	55.269	50.922	0.760526	-0.0405044	0.720022	53.5248	0.513854	0.481738	0.437944	0.428212	0.405674	-0.246673	-0.278788	-0.322583	-0.332315	-0.354852		3930	2589	1694	1547
		25	26	2381	15.9109	0.00159109	1628	3570	0.155	0.181	97.4175	113.758	1.34051	0.110268	1.45078	59.3443	1.14794	1.07619	0.978355	0.956614	0.906266	-0.192572	-0.264318	-0.362154	-0.383895	-0.434243		3915	2646	1695	1564
	g	32	37	2381	13.5501	0.00135501	1628	3570	0.15	0.191	110.7	140.958	1.52328	0.213767	1.73705	61.4148	1.42241	1.33351	1.21228	1.18534	1.12295	-0.100875	-0.189776	-0.311003	-0.337943	-0.400329		3930	2589	1695	1563
		31	37	2381	13.5318	0.00135318	1628	3570	0.139	0.198	102.721	146.322	1.41349	0.315848	1.72934	64.0362	1.47654	1.38425	1.25841	1.23045	1.16569	0.0630476	-0.0292358	-0.155077	-0.183042	-0.247802		3841	2589	1693	1573
		31	36	2381	13.6799	0.00136799	1628	3570	0.155	0.222	113.305	162.282	1.55913	0.355079	1.91421	64.1618	1.63759	1.53524	1.39567	1.36466	1.29283	0.0784593	-0.0238899	-0.163457	-0.194472	-0.266296		3822	2589	1694	1545
		30	36	2381	14.0252	0.00140252	1628	3570	0.162	0.216	115.506	154.008	1.58941	0.275499	1.86491	62.5	1.55409	1.45696	1.32451	1.29508	1.22692	-0.0353203	-0.132451	-0.264902	-0.294336	-0.362498		3910	2589	1695	1545
		28	31	2381	15.873	0.0015873	1628	3570	0.141	0.208	88.83	131.04	1.22234	0.307232	1.52957	64.8379	1.32232	1.23968	1.12698	1.10194	1.04394	0.0999834	0.0173382	-0.0953599	-0.120404	-0.178401		3930	2778	1702	1575
		27	32	2381	16.6044	0.00166044	1627	3570	0.137	0.2	82.5083	120.45	1.13535	0.275799	1.41115	64.5995	1.21546	1.13949	1.0359	1.01288	0.959574	0.0801099	0.00414362	-0.0994468	-0.122467	-0.175777		3828	2841	1695	1565
		32	36	2381	13.8889	0.00138889	1628	3570	0.153	0.215	110.16	154.8	1.51585	0.322688	1.83854	63.7226	1.56209	1.46446	1.33132	1.30174	1.23323	0.0462351	-0.0513953	-0.184528	-0.214113	-0.282625		3930	2589	1695	1554
		32	32	2381	18.8324	0.00188324	1628	3570	0.161	0.263	85.491	139.653	1.17639	0.398148	1.57454	67.1261	1.40924	1.32116	1.20106	1.17437	1.11256	0.232843	0.144766	0.0246605	-0.00202967	-0.0638384		3944	2589	1694	1566
	h	32	27	2381	25.1572	0.00251572	1626	3570	0.18	0.299	71.55	118.853	0.98456	0.348151	1.33271	67.4944	1.19934	1.12438	1.02217	0.99945	0.946848	0.21478	0.139821	0.0376047	0.01489	-0.0377127		3930	2589	1699	1560	*
		31	25	2381	27.8707	0.00278707	1628	3570	0.134	0.258	48.0792	92.5704	0.661592	0.330105	0.991696	70.6462	0.934128	0.875745	0.796132	0.77844	0.737469	0.272536	0.214153	0.13454	0.116848	0.0758777		3930	2589	1696	1559
		30	30	2381	23.0521	0.00230521	1628	3570	0.11	0.2	47.718	86.76	0.656621	0.288913	0.945535	69.4444	0.875495	0.820777	0.746161	0.729579	0.69118	0.218874	0.164155	0.0895393	0.0729579	0.034559		3930	2589	1692	1554
		29	32	2381	23.3754	0.00233754	1625	3570	0.09	0.144	38.502	61.6032	0.529805	0.169538	0.699343	66.6667	0.621638	0.582785	0.529805	0.518031	0.490767	0.0918329	0.0529805	0	-0.0117734	-0.0390383		3956	2607	1677	1556
		29	31	2381	22.553	0.0022553	1625	3570	0.096	0.178	42.5664	78.9252	0.585733	0.269315	0.855048	69.8587	0.796434	0.746657	0.678779	0.663695	0.628764	0.210701	0.160924	0.0930461	0.0779621	0.0430308		3860	2589	1677	1563
		29	30	2381	22.6142	0.00226142	1625	3570	0.112	0.215	49.5264	95.073	0.681506	0.337893	1.0194	70.5844	0.959381	0.89942	0.817655	0.799485	0.757406	0.277876	0.217914	0.136149	0.117979	0.0759008		3930	2520	1682	1565	*
		28	29	2381	23.8949	0.00238949	1624	3570	0.101	0.195	42.2685	81.6075	0.581634	0.291911	0.873545	70.7034	0.823501	0.772032	0.701848	0.686251	0.650132	0.241867	0.190399	0.120214	0.104617	0.0684988		3885	2657	1672	1575
		28	30	2381	22.9095	0.00229095	1625	3570	0.102	0.189	44.523	82.4985	0.612657	0.281281	0.893938	69.8448	0.832492	0.780461	0.70951	0.693744	0.657231	0.219836	0.167805	0.0968538	0.0810869	0.0445741		3952	2589	1681	1562
		28	31	2381	22.3115	0.00223115	1625	3570	0.093	0.169	41.6826	75.7458	0.573571	0.252063	0.825634	69.433	0.764351	0.716579	0.651435	0.636959	0.603435	0.190779	0.143007	0.0778639	0.0633875	0.0298634		3930	2589	1674	1556
		28	32	2381	23.4742	0.00234742	1625	3570	0.083	0.143	35.358	60.918	0.486542	0.188579	0.675121	68.2904	0.614723	0.576303	0.523912	0.51227	0.485308	0.128181	0.0897611	0.0373699	0.0257275	-0.0012341		3930	2527	1669	1561
	i	32	24	2381	18.859	0.0018859	1628	3570	0.164	0.289	86.961	153.242	1.19662	0.489667	1.68629	68.7768	1.54637	1.44972	1.31793	1.28864	1.22082	0.349745	0.253097	0.121304	0.0920167	0.0241936		3930	2589	1707	1559
		32	26	2381	17.2712	0.00172712	1628	3570	0.179	0.289	103.641	167.331	1.42615	0.46776	1.89391	66.8672	1.68854	1.583	1.43909	1.40711	1.33306	0.26239	0.156856	0.0129469	-0.019033	-0.0930916		3766	2649	1692	1570
		31	27	2381	16.9635	0.00169635	1628	3570	0.191	0.298	112.594	175.671	1.54935	0.461885	2.01124	66.1047	1.7727	1.6619	1.51082	1.47725	1.3995	0.223345	0.112551	-0.038531	-0.0721048	-0.149855		3764	2799	1703	1574
		31	24	2381	19.0476	0.00190476	1628	3570	0.169	0.276	88.725	144.9	1.2209	0.412937	1.63383	67.1206	1.46219	1.3708	1.24618	1.21849	1.15436	0.24129	0.149903	0.0252848	-0.00240808	-0.066539		3930	2589	1696	1580
		30	26	2381	17.4064	0.00174064	1628	3570	0.21	0.325	120.645	186.713	1.66013	0.483414	2.14354	65.9229	1.88412	1.76636	1.60578	1.5701	1.48746	0.223986	0.106229	-0.0543495	-0.0900335	-0.17267		3930	2651	1706	1573
		30	27	2381	17.7069	0.00177069	1628	3570	0.221	0.33	124.81	186.368	1.71744	0.44871	2.16615	65.1144	1.88063	1.76309	1.60281	1.5672	1.48471	0.163196	0.0456559	-0.114625	-0.150243	-0.232727		3930	2704	1717	1561
		29	26	2381	17.2414	0.00172414	1628	3570	0.218	0.341	126.44	197.78	1.73987	0.52252	2.26239	66.1622	1.9958	1.87106	1.70096	1.66316	1.57563	0.255926	0.131189	-0.0389077	-0.0767069	-0.164242		3930	2589	1710	1578	*
		33	28	2381	18.9663	0.00189663	1628	3570	0.158	0.268	83.3055	141.303	1.14632	0.427476	1.5738	67.9513	1.42589	1.33677	1.21525	1.18824	1.1257	0.279567	0.190449	0.0689244	0.0419189	-0.02062		3886	2726	1701	1580
		33	26	2381	17.7936	0.00177936	1628	3570	0.165	0.286	92.73	160.732	1.27601	0.501896	1.7779	68.4211	1.62195	1.52057	1.38234	1.35162	1.28048	0.34594	0.244568	0.106334	0.0756152	0.00447722		3930	2667	1705	1572
		33	25	2381	18.3402	0.00183402	1628	3570	0.154	0.28	83.9685	152.67	1.15544	0.508396	1.66384	69.4444	1.54059	1.44431	1.31301	1.28383	1.21626	0.385148	0.288861	0.157561	0.128383	0.0608129		3839	2589	1697	1578
	j	32	31	2381	14.4718	0.00144718	1628	3570	0.147	0.192	101.577	132.672	1.39775	0.221357	1.6191	62.0155	1.33879	1.25512	1.14102	1.11566	1.05694	-0.0589525	-0.142627	-0.256729	-0.282085	-0.340804		3930	2719	1705	1556
		31	31	2381	14.6199	0.00146199	1628	3570	0.126	0.205	86.184	140.22	1.18593	0.397099	1.58303	67.0373	1.41496	1.32652	1.20593	1.17913	1.11707	0.229029	0.140594	0.0200008	-0.00679766	-0.0688573		3930	2627	1690	1582
		31	29	2381	14.5773	0.00145773	1628	3570	0.138	0.198	94.668	135.828	1.30267	0.298482	1.60116	64.2023	1.37064	1.28498	1.16816	1.1422	1.08208	0.0679656	-0.0176994	-0.134515	-0.160474	-0.22059		3930	2627	1699	1574
		27	29	2381	10.4004	0.00104004	1625	3570	0.088	0.147	84.612	141.34	1.1643	0.417692	1.58199	67.6173	1.42627	1.33713	1.21557	1.18856	1.126	0.261967	0.172826	0.0512689	0.0242562	-0.0382993		3863	2589	1688	1583
		26	29	2381	10.5319	0.00105319	1623	3570	0.047	0.055	44.6265	52.2225	0.614081	0.0513476	0.665428	59.3952	0.526977	0.494041	0.449128	0.439148	0.416035	-0.0871037	-0.12004	-0.164953	-0.174933	-0.198046		3763	2773	1669	1573
		30	30	2381	12.0992	0.00120992	1628	3570	0.129	0.231	106.618	190.921	1.46712	0.623355	2.09047	69.1203	1.92659	1.80618	1.64198	1.60549	1.52099	0.45947	0.339058	0.17486	0.138372	0.0538722		3970	2622	1687	1578
		31	30	2381	14.1693	0.00141693	1628	3570	0.141	0.196	99.5107	138.327	1.36931	0.280078	1.64939	63.4715	1.39586	1.30862	1.18965	1.16321	1.10199	0.0265446	-0.0606965	-0.179662	-0.206098	-0.26732		3827	2613	1704	1576
	k	32	32	2381	26.4131	0.00264131	1627	3570	0.155	0.336	58.683	127.21	0.807505	0.510551	1.31806	73.0435	1.28367	1.20344	1.09404	1.06973	1.01343	0.476167	0.395938	0.286534	0.262222	0.205921		3920	2645	1684	1587
		31	31	2381	26.6667	0.00266667	1628	3570	0.173	0.344	64.875	129	0.892709	0.476387	1.3691	71.3101	1.30174	1.22038	1.10944	1.08478	1.02769	0.409029	0.327671	0.216727	0.192073	0.134979		3930	2589	1693	1574
		30	31	2381	25.6904	0.00256904	1627	3570	0.178	0.311	69.2865	121.057	0.953414	0.382276	1.33569	68.5929	1.22158	1.14523	1.04112	1.01799	0.964408	0.26817	0.191821	0.0877087	0.0645726	0.0109944		4001	2687	1681	1572	*
		29	31	2381	25.0156	0.00250156	1627	3570	0.169	0.319	67.5577	127.52	0.929625	0.444515	1.37414	70.2334	1.28681	1.20638	1.09671	1.07234	1.0159	0.357181	0.276756	0.167085	0.142714	0.0862748		3916	2652	1684	1576
		26	30	2381	25.5918	0.00255918	1628	3570	0.112	0.145	43.764	56.6587	0.602212	0.0915685	0.693781	61.8073	0.571743	0.536009	0.487281	0.476453	0.451376	-0.0304691	-0.066203	-0.114931	-0.12576	-0.150836		3930	2589	1688	1572	*
		33	33	2381	26.1952	0.00261952	1628	3570	0.173	0.319	66.0427	121.778	0.908778	0.412732	1.32151	69.742	1.22886	1.15206	1.04733	1.02405	0.970156	0.320086	0.243282	0.138549	0.115275	0.0613778		3939	2589	1701	1570
		32	31	2381	26.5604	0.00265604	1628	3570	0.188	0.361	70.782	135.917	0.973992	0.483214	1.45721	70.5905	1.37153	1.28581	1.16892	1.14294	1.08279	0.397541	0.31182	0.194928	0.168952	0.108797		3930	2589	1686	1573
		31	32	2381	26.5076	0.00265076	1628	3570	0.165	0.328	62.2463	123.738	0.856537	0.456819	1.31336	71.3043	1.24864	1.1706	1.06418	1.04053	0.985768	0.392103	0.314063	0.207645	0.183997	0.129232		3930	2634	1679	1576
	l	32	27	2381	15.6495	0.00156495	1628	3570	0.232	0.356	148.248	227.484	2.03996	0.579278	2.61924	65.7312	2.29554	2.15207	1.95643	1.91295	1.81227	0.255581	0.11211	-0.0835328	-0.127009	-0.227691		3972	2589	1702	1564	*
		32	28	2381	16.2404	0.00162404	1628	3570	0.223	0.398	137.312	245.068	1.88948	0.796631	2.68611	69.0493	2.47299	2.31842	2.10766	2.06082	1.95236	0.583507	0.428946	0.21818	0.171343	0.0628786		3878	2674	1700	1560
		32	34	2381	19.2957	0.00192957	1628	3570	0.213	0.387	110.387	200.563	1.51898	0.667281	2.18626	69.4295	2.02388	1.89739	1.7249	1.68657	1.5978	0.5049	0.378407	0.205918	0.167587	0.0788202		3908	2605	1695	1564
		31	36	2381	16.2009	0.00162009	1628	3570	0.184	0.312	113.574	192.582	1.56283	0.582324	2.14515	67.9443	1.94334	1.82189	1.65626	1.61945	1.53422	0.380515	0.259056	0.09343	0.0566243	-0.0286102		3767	2768	1695	1558
		31	28	2381	16.0836	0.00160836	1628	3570	0.223	0.365	138.65	226.939	1.90789	0.64911	2.557	67.1697	2.29004	2.14691	1.95174	1.90837	1.80793	0.382148	0.239021	0.0438473	0.000475309	-0.099965		3930	2589	1695	1564
		31	27	2381	15.7791	0.00157791	1628	3570	0.216	0.365	136.89	231.319	1.88367	0.695824	2.57949	67.8691	2.33424	2.18835	1.98941	1.9452	1.84282	0.450569	0.304679	0.105738	0.0615293	-0.0408495		3902	2589	1696	1555
		30	28	2381	15.083	0.0015083	1628	3570	0.225	0.352	149.175	233.376	2.05272	0.616727	2.66944	66.1654	2.355	2.20781	2.0071	1.9625	1.85921	0.302281	0.155094	-0.0456159	-0.0902181	-0.193507		3930	2548	1756	1536
		33	37	2381	17.094	0.0017094	1628	3570	0.163	0.33	95.355	193.05	1.31213	0.726259	2.03839	71.6768	1.94807	1.82631	1.66028	1.62339	1.53795	0.635939	0.514185	0.348157	0.311261	0.22582		3750	2612	1694	1564
		33	35	2381	18.4502	0.00184502	1628	3570	0.211	0.377	114.362	204.334	1.57367	0.665194	2.23887	69.0729	2.06193	1.93306	1.75733	1.71828	1.62784	0.488261	0.35939	0.183657	0.144606	0.0541698		3930	2589	1696	1565
		33	28	2381	16.2866	0.00162866	1628	3570	0.222	0.411	136.308	252.354	1.87566	0.859508	2.73517	69.8267	2.5465	2.38735	2.17032	2.12209	2.0104	0.670844	0.511688	0.294656	0.246427	0.134738		3930	2669	1696	1563
		33	27	2381	15.7048	0.00157048	1628	3570	0.227	0.377	144.542	240.055	1.98897	0.702973	2.69194	67.4902	2.42239	2.27099	2.06454	2.01866	1.91241	0.433425	0.282026	0.075572	0.0296933	-0.0765519		3930	2589	1696	1566
	p	28	28	2381	14.652	0.0014652	1628	3570	0.144	0.194	98.28	132.405	1.35238	0.244743	1.59712	62.7426	1.3361	1.25259	1.13872	1.11342	1.05481	-0.0162786	-0.0997848	-0.213657	-0.238962	-0.297563		3930	2589	1696	1545
		27	28	2381	13.2802	0.00132802	1628	3570	0.13	0.188	97.89	141.564	1.34701	0.317066	1.66408	64.3836	1.42852	1.33924	1.21749	1.19044	1.12778	0.0815114	-0.00777122	-0.12952	-0.156576	-0.21923		3787	2731	1688	1562
		27	27	2381	13.6426	0.00136426	1628	3570	0.137	0.198	100.421	145.134	1.38184	0.324581	1.70642	64.3693	1.46455	1.37301	1.24819	1.22046	1.15622	0.0827086	-0.00882561	-0.133645	-0.161383	-0.225617		3930	2742	1694	1563
		36	30	2381	16.899	0.0016899	1628	3570	0.194	0.259	114.799	153.263	1.57969	0.275306	1.855	62.5302	1.54658	1.44992	1.31811	1.28882	1.22098	-0.0331138	-0.129775	-0.261586	-0.290877	-0.358709		3930	2549	1694	1562
		37	32	2381	14.6843	0.00146843	1628	3570	0.189	0.286	128.709	194.766	1.77109	0.482225	2.25332	65.4163	1.96538	1.84255	1.67504	1.63782	1.55162	0.194289	0.0714529	-0.0960514	-0.133275	-0.219476		3911	2651	1694	1561
		37	31	2381	15.9872	0.00159872	1628	3570	0.192	0.275	120.096	172.013	1.65258	0.376391	2.02897	64.1624	1.73578	1.62729	1.47936	1.44648	1.37035	0.0832026	-0.0252835	-0.173219	-0.206094	-0.282224		3767	2753	1696	1546
		37	30	2381	16.5426	0.00165426	1628	3570	0.185	0.281	111.832	169.865	1.53887	0.423812	1.96268	65.5012	1.7141	1.60697	1.46088	1.42842	1.35324	0.175237	0.0681052	-0.0779831	-0.110447	-0.185627		3857	2574	1695	1544
		38	31	2381	15.3257	0.00153257	1628	3570	0.187	0.26	122.017	169.65	1.67902	0.343704	2.02272	63.4766	1.71194	1.60494	1.45904	1.42661	1.35153	0.0329219	-0.0740742	-0.219978	-0.252401	-0.327486		3821	2589	1695	1546
		38	32	2381	14.556	0.0014556	1628	3570	0.194	0.28	133.278	192.36	1.83397	0.428808	2.26277	64.3382	1.9411	1.81979	1.65435	1.61759	1.53245	0.107139	-0.0141801	-0.179615	-0.216379	-0.301515		3823	2589	1694	1563
		40	36	2381	11.8624	0.00118624	1628	3570	0.161	0.252	135.723	212.436	1.86761	0.561907	2.42952	66.1765	2.14369	2.00971	1.82701	1.78641	1.69239	0.276081	0.142101	-0.0406002	-0.0812004	-0.175222		3885	2675	1685	1561
	q	32	35	2381	9.4162	0.00094162	1628	3570	0.147	0.24	156.114	254.88	2.1482	0.726004	2.8742	67.1141	2.57199	2.41124	2.19204	2.14333	2.03052	0.423794	0.263045	0.0438408	-0.0048712	-0.117678		3930	2547	1705	1567
		32	36	2381	9.63391	0.000963391	1628	3570	0.148	0.231	153.624	239.778	2.11394	0.630896	2.74483	66.1133	2.4196	2.26837	2.06216	2.01633	1.91021	0.305664	0.154439	-0.0517771	-0.0976029	-0.203726		3930	2589	1713	1574
		31	32	2381	9.4162	0.00094162	1628	3570	0.156	0.239	165.672	253.818	2.27972	0.644314	2.92404	65.6954	2.56128	2.4012	2.18291	2.1344	2.02206	0.281555	0.121476	-0.0968151	-0.145324	-0.257661		3782	2580	1693	1560	*
		30	33	2381	9.1954	0.00091954	1628	3570	0.162	0.236	176.175	256.65	2.42425	0.584812	3.00906	64.5514	2.58985	2.42799	2.20726	2.15821	2.04462	0.165607	0.00374112	-0.216985	-0.266035	-0.379626		3930	2536	1696	1571
		29	32	2381	9.51022	0.000951022	1627	3570	0.143	0.227	150.364	238.69	2.06908	0.647782	2.71687	66.4909	2.40863	2.25809	2.05281	2.00719	1.90155	0.339542	0.189003	-0.0162778	-0.0618957	-0.167537		3899	2589	1695	1579
		33	36	2381	9.4162	0.00094162	1628	3570	0.129	0.175	136.998	185.85	1.88515	0.350873	2.23603	62.9044	1.87541	1.7582	1.59836	1.56284	1.48059	-0.0097424	-0.126956	-0.286792	-0.322311	-0.404566		3930	2589	1700	1577	*
		31	31	2381	9.45626	0.000945626	1628	3570	0.154	0.245	162.855	259.088	2.24096	0.705902	2.94686	66.5399	2.61445	2.45105	2.22823	2.17871	2.06404	0.373493	0.21009	-0.0127327	-0.0622488	-0.176918		3869	2589	1695	1562
		31	33	2381	9.13242	0.000913242	1628	3570	0.156	0.25	170.82	273.75	2.35056	0.755494	3.10605	66.7022	2.76241	2.58976	2.35433	2.30201	2.18085	0.41185	0.2392	0.00376692	-0.0485515	-0.16971		3797	2556	1692	1550
		30	29	2381	9.3633	0.00093633	1628	3570	0.152	0.253	162.336	270.204	2.23382	0.794034	3.02785	67.5387	2.72663	2.55621	2.32383	2.27219	2.1526	0.492811	0.322397	0.090014	0.0383733	-0.0812156		3808	2589	1690	1568
		30	30	2381	9.38967	0.000938967	1628	3570	0.157	0.266	167.205	283.29	2.30082	0.855552	3.15637	67.9265	2.85868	2.68001	2.43637	2.38223	2.25685	0.557862	0.379195	0.135558	0.081416	-0.0439646		3930	2589	1689	1556
	t	30	31	2381	24.0674	0.00240674	1629	3570	0.213	0.371	88.5015	154.15	1.21782	0.48467	1.70249	68.526	1.55553	1.45831	1.32574	1.29628	1.22805	0.337712	0.240491	0.107917	0.0784564	0.0102313		3930	2547	1694	1572	*
		29	32	2381	25.1572	0.00251572	1628	3570	0.208	0.393	82.68	156.218	1.13771	0.545173	1.68289	70.2538	1.57639	1.47787	1.34351	1.31366	1.24452	0.438676	0.340152	0.2058	0.175945	0.106805		3903	2537	1696	1561
		28	31	2381	25.3807	0.00253807	1628	3570	0.217	0.43	85.498	169.42	1.17649	0.623378	1.79987	71.2392	1.70962	1.60277	1.45706	1.42468	1.3497	0.533126	0.426275	0.280569	0.24819	0.173206		3930	2589	1695	1564	*
		28	34	2381	25.9605	0.00259605	1628	3570	0.186	0.316	71.6472	121.723	0.985898	0.369129	1.35503	67.9862	1.22831	1.15154	1.04685	1.02359	0.969717	0.242411	0.165641	0.0609561	0.0376926	-0.0161806		3781	2739	1695	1546
		27	33	2381	26.178	0.0026178	1628	3570	0.191	0.31	72.962	118.42	1.00399	0.333998	1.33799	66.9836	1.19498	1.12029	1.01845	0.995813	0.943402	0.190986	0.1163	0.0144554	-0.00817677	-0.060588		3930	2589	1695	1559
		27	32	2381	26.178	0.0026178	1628	3570	0.201	0.377	76.782	144.014	1.05656	0.498263	1.55482	70.1004	1.45325	1.36242	1.23856	1.21104	1.1473	0.39669	0.305862	0.182006	0.154482	0.0907437		3755	2589	1695	1546
		27	30	2381	25.8799	0.00258799	1628	3570	0.194	0.423	74.9616	163.447	1.03151	0.659366	1.69087	73.1581	1.64935	1.54626	1.40569	1.37445	1.30211	0.61784	0.514756	0.374187	0.342949	0.270609		3930	2589	1695	1546
		26	33	2381	23.8663	0.00238663	1628	3570	0.163	0.25	68.297	104.75	0.939798	0.266487	1.20628	65.7203	1.05703	0.990968	0.90088	0.88086	0.834499	0.117234	0.05117	-0.038918	-0.0589375	-0.105299		3930	2618	1731	1514
		26	32	2381	25.5232	0.00255232	1628	3570	0.176	0.289	68.9568	113.23	0.948877	0.325583	1.27446	67.2406	1.14261	1.07119	0.973812	0.952171	0.902057	0.193729	0.122316	0.024935	0.00329471	-0.0468196		3930	2589	1706	1514
		26	31	2381	26.8097	0.00268097	1628	3570	0.173	0.304	64.529	113.392	0.887948	0.360928	1.24888	68.7161	1.14424	1.07272	0.975203	0.953532	0.903346	0.25629	0.184775	0.087255	0.0655838	0.0153979		3930	2589	1697	1514

## Sheet: 63-125 data
													Avg H2Om wt% (all)	Avg OH wt% (all)	Avg H2Ot wt% (all)
													1.14415	0.484101	1.62825
													stdev H2Om (all)	stdev OH (all)	stdev H2Ot (all)
													0.403664	0.172931	0.51284
													Conventional method	Species dependent ε3500 method			Conventional method 1630 & 3500 bands
													Newman et al 1986	Newman et al 1986 values			Fixed ε3500 values from literature					Fixed ε3500 OH-by-difference
													ε1630	ε3500OH	ε3500H2Om		Okumura	Ihinger	Dobson	Hauri	Aubaud	Okumura	Ihinger	Dobson	Hauri	Aubaud
													55	100	56		75	80	88	90	95	75	80	88	90	95
					From reflectance		Peak Positions		Measured absorbances		Normalised absorbances (1/cm)																	3500 H2Ot baseline positions		1630 H2Om baseline positions
Data set	Shard	Row	Col	Density (g/L)	Thickness (µm)	Thickness (cm)	1630 H2Om	3500 H2Ot	1630 H2Om	3500 H2Ot	Norm 1630 H2Om	Norm 3500 H2Ot	H2Om wt% (1630)	Calc OH wt%	Calc H2Ot wt%	Calc ε3500	H2Ot wt%	H2Ot wt%	H2Ot wt%	H2Ot wt%	H2Ot wt%	OH wt%	OH wt%	OH wt%	OH wt%	OH wt%		left	right	left	right	*indicates flexicurve baseline used for 1630 H2Om peak
63-125 micron size fraction
	b	32	27	2385	17.5901	0.00175901	1628	3570	0.198	0.332	112.563	188.742	1.54632	0.560111	2.10643	67.6998	1.9014	1.78256	1.62051	1.5845	1.50111	0.355081	0.236243	0.0741921	0.0381807	-0.045214		3940	2625	1693	1560
		29	34	2385	33.2668	0.00332668	1628	3570	0.204	0.395	61.3224	118.737	0.842409	0.425375	1.26778	70.7632	1.19617	1.1214	1.01946	0.996804	0.944341	0.353757	0.278996	0.17705	0.154396	0.101932		3930	2589	1696	1558
		29	21	2385	14.7275	0.00147275	1628	3570	0.189	0.359	128.331	243.761	1.76293	0.854508	2.61744	70.3646	2.45567	2.30219	2.0929	2.04639	1.93868	0.692735	0.539256	0.329967	0.283458	0.175753		3930	2632	1700	1562
		28	23	2385	14.9813	0.00149813	1628	3570	0.195	0.36	130.162	240.3	1.78809	0.814269	2.60236	69.7674	2.4208	2.2695	2.06318	2.01733	1.91116	0.632709	0.481409	0.275091	0.229242	0.123067		3959	2589	1702	1562
		28	24	2385	15.6128	0.00156128	1628	3570	0.196	0.378	125.538	242.109	1.72456	0.863513	2.58808	70.6806	2.43902	2.28659	2.07871	2.03252	1.92555	0.714462	0.562023	0.354151	0.307958	0.200983		3966	2589	1701	1554
		28	32	2385	34.163	0.0034163	1628	3570	0.201	0.378	58.8356	110.646	0.808246	0.383374	1.19162	70.1559	1.11466	1.04499	0.949991	0.92888	0.879992	0.30641	0.236744	0.141745	0.120634	0.0717453		3930	2589	1700	1543
		27	33	2385	34.2633	0.00342633	1628	3570	0.201	0.379	58.6633	110.614	0.805879	0.384457	1.19034	70.2112	1.11433	1.04469	0.949715	0.92861	0.879736	0.308453	0.238807	0.143835	0.122731	0.0738565		3930	2589	1713	1554
		24	39	2385	36.9004	0.00369004	1628	3570	0.166	0.408	44.986	110.568	0.617989	0.489329	1.10732	75.4438	1.11387	1.04425	0.949321	0.928225	0.879371	0.495881	0.426264	0.331332	0.310236	0.261382		3930	2589	1696	1571
		33	27	2385	17.6367	0.00176367	1628	3570	0.203	0.34	115.101	192.78	1.58119	0.571096	2.15228	67.6752	1.94208	1.8207	1.65518	1.6184	1.53322	0.360895	0.239515	0.0739964	0.0372145	-0.0479644		3930	2649	1734	1546
		34	26	2385	17.4749	0.00174749	1628	3570	0.202	0.359	115.595	205.438	1.58796	0.662936	2.2509	68.9589	2.0696	1.94025	1.76386	1.72466	1.63389	0.48163	0.352281	0.175895	0.136698	0.045926		3930	2557	1721	1557
	c	31	34	2385	31.4837	0.00314837	1628	3570	0.245	0.455	77.8181	144.519	1.06902	0.493275	1.56229	69.8925	1.4559	1.36491	1.24082	1.21325	1.14939	0.386882	0.295889	0.171806	0.144232	0.0803772		3930	2510	1702	1556
		31	26	2385	18.018	0.0018018	1628	3570	0.108	0.164	59.94	91.02	0.823418	0.226592	1.05001	65.4952	0.916942	0.859633	0.781485	0.764119	0.723902	0.093524	0.0362152	-0.0419333	-0.0592997	-0.0995164		4006	2694	1696	1562
		30	25	2385	17.9791	0.00179791	1628	3570	0.146	0.205	81.2052	114.021	1.11555	0.236786	1.35233	63.7042	1.14866	1.07686	0.978968	0.957213	0.906834	0.0331098	-0.0386812	-0.136578	-0.158333	-0.208712		3930	2589	1709	1560
		30	33	2385	29.7619	0.00297619	1628	3570	0.239	0.441	80.304	148.176	1.10317	0.501779	1.60495	69.7564	1.49274	1.39944	1.27222	1.24395	1.17848	0.38957	0.296274	0.169052	0.140781	0.0753097		3930	2589	1703	1565
		28	32	2385	32.6797	0.00326797	1628	3570	0.219	0.449	67.014	137.394	0.920596	0.522554	1.44315	71.9321	1.38412	1.29761	1.17965	1.15343	1.09272	0.463521	0.377014	0.259049	0.232835	0.172128		3930	2589	1694	1562
		27	38	2385	30.1464	0.00301464	1628	3570	0.214	0.39	70.9869	129.369	0.975173	0.431355	1.40653	69.4939	1.30327	1.22181	1.11074	1.08606	1.0289	0.328096	0.246641	0.135567	0.110884	0.0537233		3790	2589	1696	1571
		26	37	2385	29.9529	0.00299529	1628	3570	0.214	0.381	71.4454	127.2	0.981473	0.411439	1.39291	68.9967	1.28142	1.20133	1.09212	1.06785	1.01165	0.299945	0.219857	0.110645	0.0863757	0.0301732		3930	2589	1696	1574
		25	37	2385	30.546	0.0030546	1628	3570	0.207	0.339	67.7666	110.98	0.930935	0.317193	1.24813	67.1819	1.11802	1.04815	0.95286	0.931685	0.882649	0.187087	0.11721	0.0219242	0.000749545	-0.0482865		3818	2816	1697	1563
		25	30	2385	32.113	0.0032113	1628	3570	0.193	0.419	60.1002	130.477	0.825619	0.523477	1.3491	73.0729	1.31443	1.23228	1.12025	1.09536	1.03771	0.488812	0.40666	0.294635	0.26974	0.21209		3870	2589	1696	1555
		21	36	2385	31.4042	0.00314042	1628	3570	0.192	0.283	61.1383	90.1153	0.839879	0.210539	1.05042	64.8191	0.907828	0.851089	0.773717	0.756523	0.716706	0.0679486	0.0112093	-0.0661624	-0.0833561	-0.123173		3958	2616	1721	1524	*
	d	30	30	2385	24.0154	0.00240154	1628	3570	0.19	0.336	79.116	139.91	1.08685	0.448467	1.53531	68.8525	1.40947	1.32138	1.20125	1.17456	1.11274	0.322622	0.23453	0.114405	0.0877104	0.0258916		3949	2589	1713	1564
		26	43	2385	21.5983	0.00215983	1628	3570	0.16	0.29	74.08	134.27	1.01766	0.444592	1.46226	69.378	1.35265	1.26811	1.15282	1.1272	1.06788	0.334981	0.250441	0.135159	0.10954	0.0502137		3912	2589	1698	1545
		25	44	2385	21.5517	0.00215517	1628	3570	0.139	0.275	64.496	127.6	0.886006	0.467926	1.35393	71.2066	1.28545	1.20511	1.09556	1.07121	1.01483	0.399446	0.319105	0.20955	0.185204	0.128825		3991	2589	1705	1566
		24	41	2385	15.0489	0.00150489	1628	3570	0.177	0.288	117.617	191.376	1.61574	0.541137	2.15688	67.0391	1.92794	1.80744	1.64313	1.60661	1.52205	0.312194	0.191698	0.0273855	-0.00912848	-0.0936871		3930	2682	1698	1555
		34	22	2385	18.1159	0.00181159	1628	3570	0.198	0.32	109.296	176.64	1.50144	0.493807	1.99525	66.8896	1.77948	1.66827	1.51661	1.4829	1.40486	0.278044	0.166827	0.0151661	-0.0185363	-0.0965839		3900	2651	1698	1552
		28	34	2385	22.1117	0.00221117	1628	3570	0.194	0.315	87.7365	142.459	1.20527	0.401404	1.60667	66.9928	1.43514	1.34544	1.22313	1.19595	1.13301	0.229871	0.140175	0.0178616	-0.00931909	-0.0722638		3906	2589	1702	1564
		28	37	2385	22.409	0.0022409	1628	3570	0.183	0.308	81.6638	137.445	1.12185	0.41024	1.53209	67.7817	1.38463	1.29809	1.18008	1.15386	1.09313	0.262786	0.176246	0.0582379	0.0320138	-0.0287156		3911	2589	1699	1566
		27	32	2385	17.2117	0.00172117	1628	3570	0.18	0.292	104.58	169.652	1.43665	0.477289	1.91394	66.9725	1.70909	1.60227	1.45661	1.42424	1.34928	0.272432	0.165614	0.0199535	-0.0124155	-0.0873755		3892	2589	1694	1565
		27	28	2385	21.5983	0.00215983	1628	3570	0.135	0.208	62.505	96.304	0.858655	0.246784	1.10544	65.8228	0.970174	0.909538	0.826853	0.808478	0.765927	0.111519	0.0508832	-0.031802	-0.0501765	-0.092728		3877	2589	1697	1563
		29	31	2385	23.8521	0.00238521	1628	3570	0.184	0.315	77.142	132.064	1.05973	0.404367	1.4641	68.1523	1.33042	1.24727	1.13388	1.10868	1.05033	0.270692	0.18754	0.0741522	0.0489548	-0.00939691		3914	2526	1695	1570
	e	32	38	2385	30.3819	0.00303819	1628	3570	0.141	0.338	46.4091	111.25	0.63754	0.483535	1.12108	74.9778	1.12074	1.0507	0.955179	0.933953	0.884798	0.483204	0.413157	0.317639	0.296413	0.247258		3930	2589	1696	1546
		31	38	2385	30.3424	0.00303424	1628	3570	0.135	0.303	44.4921	99.8601	0.611205	0.412224	1.02343	73.7226	1.006	0.943124	0.857385	0.838332	0.794209	0.394793	0.331918	0.24618	0.227127	0.183004		3930	2589	1703	1554
		27	35	2385	37.8788	0.00378788	1628	3570	0.132	0.289	34.848	76.296	0.47872	0.308375	0.787095	73.2387	0.768612	0.720573	0.655067	0.64051	0.606799	0.289892	0.241853	0.176347	0.16179	0.128079		3930	2589	1702	1554
		23	40	2385	27.3224	0.00273224	1628	3570	0.126	0.274	46.116	100.284	0.633513	0.402934	1.03645	73.1057	1.01027	0.947127	0.861024	0.84189	0.79758	0.376756	0.313614	0.227512	0.208378	0.164068		3930	2623	1694	1545
		21	40	2385	27.4833	0.00274833	1628	3570	0.123	0.279	44.7544	101.516	0.614808	0.422718	1.03753	73.9269	1.02268	0.958764	0.871603	0.852234	0.80738	0.407873	0.343955	0.256795	0.237426	0.192572		3930	2589	1696	1562
		15	41	2385	39.7614	0.00397614	1629	3570	0.128	0.287	32.192	72.1805	0.442234	0.297713	0.739947	73.7031	0.727152	0.681705	0.619732	0.60596	0.574067	0.284918	0.239471	0.177498	0.163726	0.131834		3930	2535	1695	1567
		33	34	2385	34.153	0.0034153	1628	3570	0.135	0.27	39.528	79.056	0.543011	0.293226	0.836237	71.4286	0.796416	0.74664	0.678764	0.66368	0.628749	0.253405	0.203629	0.135753	0.120669	0.0857386		3930	2589	1702	1558	*
		33	30	2385	33.9559	0.00339559	1628	3570	0.137	0.266	40.3465	78.337	0.554255	0.281497	0.835752	70.82	0.789173	0.739849	0.67259	0.657644	0.623031	0.234918	0.185594	0.118335	0.103389	0.0687762		3930	2589	1701	1555
		34	31	2385	33.67	0.003367	1628	3570	0.137	0.28	40.689	83.16	0.55896	0.315302	0.874262	71.8686	0.83776	0.7854	0.714	0.698133	0.661389	0.2788	0.22644	0.15504	0.139173	0.102429		3930	2589	1695	1546	*
		35	32	2385	32.9489	0.00329489	1628	3570	0.134	0.278	40.669	84.373	0.558685	0.324621	0.883306	72.1703	0.84998	0.796856	0.724415	0.708317	0.671037	0.291295	0.238171	0.165729	0.149631	0.112351		3930	2589	1694	1553
	f	28	32	2385	16.28	0.001628	1626	3570	0.132	0.224	81.081	137.592	1.11384	0.415834	1.52967	67.9612	1.38611	1.29948	1.18135	1.15509	1.0943	0.272272	0.18564	0.0675055	0.0412533	-0.0195411		3930	2647	1690	1574
		27	34	2385	9.49668	0.000949668	1625	3570	0.083	0.075	87.399	78.975	1.20063	-0.0756543	1.12498	53.041	0.7956	0.745875	0.678068	0.663	0.628105	-0.405033	-0.454758	-0.522565	-0.537633	-0.572527		3930	2589	1687	1564
		27	32	2385	16.2602	0.00162602	1626	3570	0.13	0.202	79.95	124.23	1.0983	0.323577	1.42188	66.0131	1.2515	1.17328	1.06662	1.04292	0.988028	0.153199	0.0749803	-0.0316818	-0.0553845	-0.110275		3930	2589	1685	1570
		33	37	2385	7.37463	0.000737463	1625	3570	0.094	0.138	127.464	187.128	1.75102	0.433284	2.18431	64.728	1.88514	1.76732	1.60665	1.57095	1.48827	0.134121	0.0162994	-0.144366	-0.180069	-0.262751		3710	2847	1689	1555
		33	36	2385	7.57576	0.000757576	1625	3570	0.11	0.168	145.2	221.76	1.99467	0.558507	2.55317	65.625	2.23403	2.0944	1.904	1.86169	1.76371	0.23936	0.0997333	-0.0906667	-0.132978	-0.230961		3930	2589	1706	1563	*
		22	30	2385	9.14495	0.000914495	1627	3570	0.094	0.145	102.789	158.558	1.41205	0.407241	1.81929	65.8492	1.59732	1.49749	1.36135	1.3311	1.26104	0.185269	0.0854366	-0.0506986	-0.0809509	-0.151009		3930	2554	1705	1555
		19	30	2385	7.8064	0.00078064	1625	3570	0.067	0.116	85.827	148.596	1.17904	0.462464	1.6415	68.3962	1.49697	1.40341	1.27582	1.24747	1.18182	0.31793	0.224369	0.0967867	0.068435	0.00277856		3930	2589	1688	1568
		27	24	2385	10.983	0.0010983	1627	3570	0.111	0.18	101.066	163.89	1.38837	0.46079	1.84916	66.9643	1.65104	1.54785	1.40714	1.37587	1.30345	0.262665	0.159475	0.0187618	-0.0125079	-0.0849219		3757	2589	1685	1571
		28	35	2385	9.44287	0.000944287	1626	3570	0.073	0.087	77.307	92.133	1.062	0.101399	1.16339	59.8349	0.928155	0.870145	0.791041	0.773462	0.732754	-0.13384	-0.19185	-0.270954	-0.288533	-0.329241		3930	2589	1675	1573
		29	33	2385	14.881	0.0014881	1626	3570	0.13	0.211	87.36	141.792	1.2001	0.399263	1.59936	66.9841	1.42842	1.33915	1.21741	1.19035	1.1277	0.228326	0.13905	0.0173091	-0.00974438	-0.0723945		3930	2589	1697	1569
	g	31	34	2385	42.9185	0.00429185	1628	3570	0.201	0.475	46.833	110.675	0.643362	0.475928	1.11929	74.709	1.11495	1.04526	0.95024	0.929123	0.880222	0.471586	0.401901	0.306877	0.285761	0.23686		3930	2589	1691	1565
		41	41	2385	64.3501	0.00643501	1628	3570	0.214	0.42	33.2556	65.268	0.456845	0.237303	0.694148	71.0419	0.657515	0.61642	0.560382	0.547929	0.519091	0.20067	0.159575	0.103537	0.0910843	0.0622459		3930	2515	1705	1545
		31	32	2385	41.7973	0.00417973	1628	3570	0.199	0.484	47.6107	115.797	0.654047	0.508645	1.16269	75.2488	1.16655	1.09364	0.994217	0.972123	0.920959	0.512501	0.439592	0.34017	0.318076	0.266912		3930	2555	1707	1560
		32	34	2385	44.843	0.0044843	1628	3570	0.207	0.495	46.161	110.385	0.634131	0.478907	1.11304	74.9319	1.11203	1.04252	0.94775	0.926689	0.877916	0.477896	0.408394	0.313619	0.292558	0.243785		3930	2589	1697	1563
		30	34	2385	42.3472	0.00423472	1628	3570	0.202	0.482	47.7009	113.821	0.655285	0.49302	1.1483	74.8912	1.14664	1.07497	0.97725	0.955533	0.905242	0.491355	0.41969	0.321965	0.300249	0.249957		3984	2486	1701	1565
		28	34	2385	41.58	0.004158	1628	3570	0.2	0.465	48.1	111.832	0.660768	0.474927	1.13569	74.4	1.12661	1.0562	0.960178	0.938841	0.889428	0.465841	0.395428	0.29941	0.278073	0.22866		3930	2589	1705	1562
		21	34	2385	39.0625	0.00390625	1628	3570	0.247	0.486	63.232	124.416	0.868642	0.453593	1.32223	71.0942	1.25338	1.17504	1.06822	1.04448	0.989507	0.384734	0.306398	0.199577	0.175838	0.120866		3930	2589	1695	1567
		27	34	2385	42.1941	0.00421941	1628	3570	0.201	0.457	47.637	108.309	0.654407	0.451867	1.10627	73.9722	1.09111	1.02292	0.929926	0.909261	0.861405	0.436706	0.368511	0.275518	0.254853	0.206998		3930	2589	1698	1570
	h	33	27	2385	13.1752	0.00131752	1628	3570	0.166	0.263	125.994	199.617	1.73083	0.538954	2.26978	66.4477	2.01096	1.88527	1.71388	1.6758	1.5876	0.28013	0.154445	-0.0169433	-0.0550296	-0.143229		3989	2705	1705	1573
		33	26	2385	12.9702	0.00129702	1628	3570	0.158	0.27	121.818	208.17	1.67346	0.635703	2.30916	68.113	2.09712	1.96605	1.78732	1.7476	1.65562	0.423661	0.292591	0.113859	0.0741406	-0.0178383		3973	2460	1694	1575
		33	25	2385	12.6263	0.00126263	1628	3570	0.158	0.271	125.136	214.632	1.71904	0.659002	2.37804	68.1933	2.16222	2.02708	1.8428	1.80185	1.70701	0.443179	0.30804	0.12376	0.0828089	-0.0120253		3930	2502	1704	1568
		34	27	2385	13.5685	0.00135685	1628	3570	0.169	0.27	124.553	198.99	1.71103	0.545303	2.25633	66.6338	2.00464	1.87935	1.7085	1.67053	1.58261	0.293609	0.168319	-0.00253111	-0.0404978	-0.128421		3930	2653	1702	1564
		35	28	2385	14.6843	0.00146843	1628	3570	0.173	0.289	117.813	196.809	1.61844	0.580674	2.19912	67.6182	1.98267	1.85875	1.68977	1.65222	1.56526	0.364227	0.24031	0.071333	0.0337825	-0.0531767		3909	2589	1710	1560
		32	20	2385	10.7009	0.00107009	1624	3570	0.088	0.147	82.236	137.371	1.12971	0.405282	1.53499	67.6173	1.38389	1.2974	1.17945	1.15324	1.09255	0.254184	0.167691	0.0497456	0.0235356	-0.0371614		3930	2774	1684	1574
		32	21	2385	11.0193	0.00110193	1624	3570	0.116	0.187	105.27	169.703	1.44613	0.472362	1.9185	66.8335	1.7096	1.60275	1.45704	1.42466	1.34968	0.263462	0.156613	0.0109083	-0.0214704	-0.0964526		3930	2589	1704	1572
		31	21	2385	11.0011	0.00110011	1624	3570	0.083	0.131	75.447	119.079	1.03644	0.3193	1.35574	66.3627	1.19961	1.12464	1.0224	0.999676	0.947061	0.163167	0.0881914	-0.0140482	-0.0367681	-0.0893826		3930	2883	1686	1573	*
		32	25	2385	12.21	0.001221	1627	3570	0.152	0.273	124.488	223.587	1.71014	0.731647	2.44178	69.184	2.25243	2.11166	1.91969	1.87703	1.77824	0.542294	0.401517	0.209548	0.166888	0.0680976		3955	2528	1696	1569
		32	26	2385	13.0208	0.00130208	1628	3570	0.156	0.276	119.808	211.968	1.64585	0.679862	2.32571	68.8623	2.13538	2.00192	1.81993	1.77948	1.68583	0.489534	0.356073	0.17408	0.133637	0.0399801		3930	2639	1702	1572
	i	32	23	2385	21.4707	0.00214707	1628	3570	0.27	0.472	125.753	219.834	1.72751	0.693563	2.42107	68.6047	2.21462	2.07621	1.88746	1.84552	1.74839	0.487115	0.348701	0.159955	0.118011	0.0208783		3930	2803	1706	1547
		32	37	2385	21.322	0.0021322	1628	3570	0.273	0.478	128.037	224.182	1.75889	0.70884	2.46773	68.6387	2.25843	2.11727	1.92479	1.88202	1.78297	0.499534	0.358382	0.165903	0.12313	0.0240758		3930	2589	1708	1549
		32	38	2385	22.0386	0.00220386	1628	3570	0.305	0.618	138.394	280.418	1.90117	1.05406	2.95522	71.6937	2.82495	2.64839	2.40762	2.35412	2.23022	0.92378	0.747221	0.506458	0.452956	0.329054		3930	2589	1706	1553
		31	39	2385	21.7297	0.00217297	1628	3570	0.279	0.522	128.396	240.224	1.76382	0.827289	2.59111	70.0483	2.42004	2.26879	2.06253	2.0167	1.91056	0.656217	0.504965	0.298712	0.252878	0.146736		3910	2589	1701	1545
		31	38	2385	21.1305	0.00211305	1628	3570	0.283	0.491	133.93	232.366	1.83984	0.72534	2.56518	68.4416	2.34087	2.19457	1.99506	1.95072	1.84806	0.501027	0.354722	0.155216	0.110882	0.00821206		3930	2589	1708	1540
		31	28	2385	17.7305	0.00177305	1628	3570	0.247	0.454	139.308	256.056	1.91373	0.862959	2.77668	69.6746	2.57953	2.41831	2.19846	2.14961	2.03647	0.665801	0.504581	0.284735	0.23588	0.122743		3930	2589	1699	1569	*
		31	27	2385	18.2815	0.00182815	1628	3570	0.248	0.474	135.656	259.278	1.86356	0.915397	2.77895	70.4938	2.61199	2.44874	2.22612	2.17665	2.06209	0.748429	0.585179	0.362567	0.313098	0.198537		3930	2589	1715	1564
		30	28	2385	17.9211	0.00179211	1628	3570	0.207	0.402	115.506	224.316	1.58675	0.806253	2.393	70.8245	2.25978	2.11854	1.92595	1.88315	1.78403	0.673027	0.531791	0.339196	0.296398	0.197285		3930	2589	1695	1566	*
		30	30	2385	17.66	0.001766	1628	3570	0.225	0.434	127.406	245.752	1.75023	0.876669	2.6269	70.684	2.47573	2.321	2.11	2.06311	1.95452	0.725502	0.570769	0.359769	0.31288	0.204296		3930	2510	1706	1555
		35	35	2385	20.8333	0.00208333	1628	3570	0.25	0.448	120	215.04	1.64848	0.701595	2.35008	69.1358	2.16633	2.03093	1.8463	1.80527	1.71026	0.517844	0.382448	0.197818	0.156789	0.0617748		3930	2589	1698	1546
	j	32	42	2385	19.1205	0.00191205	1627	3570	0.173	0.214	90.479	111.922	1.24294	0.149584	1.39253	60.7264	1.12751	1.05704	0.960946	0.939592	0.89014	-0.115433	-0.185903	-0.281997	-0.303352	-0.352804		3930	2589	1696	1567
		31	42	2385	19.1296	0.00191296	1627	3570	0.138	0.141	72.1395	73.7078	0.991007	0.00193893	0.992946	56.0859	0.742537	0.696129	0.632844	0.618781	0.586214	-0.24847	-0.294879	-0.358163	-0.372226	-0.404794		3930	2621	1697	1563
		33	29	2385	14.881	0.0014881	1628	3570	0.22	0.33	147.84	221.76	2.03093	0.538197	2.56913	65.2174	2.23403	2.0944	1.904	1.86169	1.76371	0.203093	0.0634667	-0.126933	-0.169244	-0.267228		3951	2589	1705	1550
		34	24	2385	13.0976	0.00130976	1628	3570	0.203	0.292	154.99	222.942	2.12916	0.49212	2.62128	64.2606	2.24593	2.10556	1.91415	1.87161	1.77311	0.116772	-0.0235991	-0.215014	-0.257551	-0.356056		3951	2589	1705	1556
		34	30	2385	15.7233	0.00157233	1628	3570	0.197	0.296	125.292	188.256	1.72118	0.458516	2.1797	65.2557	1.8965	1.77797	1.61634	1.58042	1.49724	0.175322	0.0567903	-0.104844	-0.140762	-0.223942		3930	2589	1705	1563
		34	31	2385	16.2075	0.00162075	1628	3570	0.202	0.294	124.634	181.398	1.71214	0.411762	2.12391	64.5303	1.82742	1.7132	1.55746	1.52285	1.4427	0.115273	0.00105949	-0.154686	-0.189296	-0.269446		3937	2589	1701	1556
		35	30	2385	15.4321	0.00154321	1628	3570	0.172	0.242	111.456	156.816	1.53111	0.327409	1.85852	63.7513	1.57978	1.48104	1.3464	1.31648	1.24719	0.0486633	-0.0500727	-0.184713	-0.214633	-0.283921		3930	2589	1700	1555
		35	24	2385	12.9702	0.00129702	1629	3570	0.169	0.246	130.299	189.666	1.78997	0.430651	2.22062	64.5331	1.91071	1.79129	1.62845	1.59226	1.50845	0.120743	0.00132394	-0.161521	-0.197708	-0.281511		3930	2589	1692	1564
		31	43	2385	19.3798	0.00193798	1625	3570	0.103	0.098	53.148	50.568	0.730114	-0.0267945	0.703319	54.3237	0.509426	0.477587	0.43417	0.424521	0.402178	-0.220688	-0.252527	-0.295944	-0.305592	-0.327936		3930	2589	1684	1578	*
		33	38	2385	14.1543	0.00141543	1627	3570	0.23	0.353	162.495	249.394	2.23225	0.634251	2.86651	65.7356	2.51242	2.35539	2.14127	2.09368	1.98349	0.280164	0.123138	-0.0909886	-0.138572	-0.248766		3906	2561	1704	1554
	k	32	25	2385	29.6033	0.00296033	1628	3570	0.269	0.449	90.8682	151.672	1.24829	0.446925	1.69522	67.6001	1.52796	1.43246	1.30224	1.2733	1.20628	0.279667	0.184169	0.0539456	0.0250071	-0.0420086		3930	2589	1694	1568
		31	31	2385	34.2231	0.00342231	1628	3570	0.243	0.423	71.0046	123.601	0.975417	0.387638	1.36305	68.5131	1.24516	1.16734	1.06122	1.03763	0.983022	0.269745	0.191922	0.0858005	0.0622179	0.00760559		3913	2589	1695	1544
		30	31	2385	34.5871	0.00345871	1629	3570	0.231	0.396	66.7879	114.494	0.91749	0.351268	1.26876	68.1818	1.15342	1.08133	0.983025	0.96118	0.910592	0.235926	0.163838	0.065535	0.04369	-0.00689842		3963	2502	1705	1574	*
		29	31	2385	34.5224	0.00345224	1628	3570	0.224	0.403	64.8853	116.736	0.891354	0.382845	1.2742	69.2202	1.176	1.1025	1.00228	0.980003	0.928424	0.28465	0.211149	0.110922	0.0886491	0.0370699		3930	2589	1695	1545
		28	30	2385	31.9285	0.00319285	1629	3570	0.217	0.392	67.9644	122.774	0.933652	0.404783	1.33844	69.3069	1.23684	1.15954	1.05412	1.0307	0.976451	0.303186	0.225884	0.120471	0.0970463	0.042799		3930	2589	1691	1552
		27	34	2385	31.0559	0.00310559	1629	3570	0.208	0.372	66.976	119.784	0.920074	0.389793	1.30987	69.0936	1.20671	1.13129	1.02845	1.00559	0.952668	0.286639	0.211219	0.108374	0.0855197	0.0325937		3930	2589	1695	1563
		27	33	2385	30.581	0.0030581	1628	3570	0.204	0.366	66.708	119.682	0.916393	0.391084	1.30748	69.161	1.20569	1.13033	1.02757	1.00474	0.951857	0.289293	0.213937	0.11118	0.0883451	0.0354641		3930	2589	1692	1570
		23	34	2385	32.2581	0.00322581	1629	3570	0.171	0.367	53.01	113.77	0.728218	0.451793	1.18001	72.8464	1.14613	1.07449	0.976813	0.955106	0.904837	0.417909	0.346276	0.248595	0.226888	0.176619		3816	2650	1694	1563
		23	35	2385	32.3276	0.00323276	1629	3570	0.169	0.355	52.2773	109.813	0.718153	0.427535	1.14569	72.4194	1.10627	1.03713	0.942842	0.92189	0.873369	0.388114	0.318973	0.224688	0.203736	0.155216		3930	2607	1691	1565
		22	35	2385	32.6797	0.00326797	1629	3570	0.185	0.421	56.61	128.826	0.777673	0.537855	1.31553	73.9895	1.2978	1.21669	1.10608	1.0815	1.02458	0.52013	0.439017	0.328409	0.303829	0.246908		4016	2607	1693	1576
	n	31	25	2385	10.3199	0.00103199	1627	3570	0.09	0.144	87.21	139.536	1.19804	0.383372	1.58141	66.6667	1.4057	1.31784	1.19804	1.17141	1.10976	0.20766	0.119804	0	-0.026623	-0.0882764		3930	2669	1676	1573
		30	37	2385	12.4069	0.00124069	1626	3570	0.112	0.166	90.272	133.796	1.2401	0.316447	1.55655	64.9452	1.34787	1.26363	1.14875	1.12323	1.06411	0.107771	0.0235287	-0.0913467	-0.116875	-0.175992		3833	2589	1684	1572
		29	36	2385	12.1803	0.00121803	1628	3570	0.143	0.195	117.403	160.095	1.61281	0.306434	1.91924	63.0252	1.61281	1.51201	1.37455	1.34401	1.27327	0	-0.100801	-0.238256	-0.268801	-0.339539		3912	2589	1697	1562
		29	26	2385	11.8624	0.00118624	1627	3570	0.132	0.178	111.276	150.054	1.52864	0.277703	1.80634	62.7645	1.51166	1.41718	1.28834	1.25971	1.19341	-0.0169849	-0.111463	-0.240298	-0.268927	-0.335228		3930	2589	1689	1561
		28	23	2385	13.2275	0.00132275	1624	3570	0.118	0.159	89.208	120.204	1.22548	0.221937	1.44742	62.7466	1.21094	1.13526	1.03205	1.00912	0.956008	-0.0145396	-0.0902236	-0.193429	-0.216364	-0.269475		3930	2589	1693	1563
		28	25	2385	11.3379	0.00113379	1627	3570	0.133	0.189	117.306	166.698	1.61148	0.357069	1.96855	63.981	1.67933	1.57437	1.43125	1.39944	1.32579	0.0678516	-0.0371064	-0.180231	-0.212036	-0.285691		3930	2644	1688	1563
		28	26	2385	11.1297	0.00111297	1626	3570	0.135	0.171	121.297	153.644	1.66631	0.227729	1.89404	61.2903	1.54782	1.45108	1.31916	1.28985	1.22196	-0.118493	-0.215232	-0.347148	-0.376462	-0.444349		3930	2589	1695	1554
		27	25	2385	11.3379	0.00113379	1627	3570	0.122	0.177	107.604	156.114	1.4782	0.351738	1.82993	64.4574	1.5727	1.47441	1.34037	1.31059	1.24161	0.0945076	-0.00378636	-0.137824	-0.16761	-0.236588		3930	2627	1695	1563
		34	38	2385	16.8776	0.00168776	1628	3570	0.158	0.224	93.615	132.72	1.28602	0.2826	1.56862	63.9269	1.33703	1.25347	1.13952	1.11419	1.05555	0.0510069	-0.0325576	-0.146509	-0.171832	-0.230473		3907	2738	1709	1554
		34	39	2385	16.7294	0.00167294	1628	3570	0.139	0.231	83.0873	138.08	1.1414	0.404089	1.54549	67.5044	1.39103	1.30409	1.18554	1.15919	1.09818	0.24963	0.162691	0.0441369	0.0177916	-0.0432185		3930	2690	1696	1560
	o	32	36	2385	19.4081	0.00194081	1629	3570	0.203	0.332	104.596	171.063	1.43687	0.487828	1.9247	67.1521	1.7233	1.6156	1.46872	1.43608	1.3605	0.28643	0.178724	0.0318518	-0.000786465	-0.0763699		3930	2589	1705	1563
		31	36	2385	19.3573	0.00193573	1630	3570	0.2	0.335	103.32	173.061	1.41935	0.512739	1.93208	67.6768	1.74343	1.63447	1.48588	1.45286	1.37639	0.324084	0.21512	0.0665318	0.0335123	-0.0429539		3920	2589	1705	1563
		31	35	2385	19.2123	0.00192123	1628	3570	0.215	0.355	111.907	184.777	1.53732	0.5352	2.07252	67.3624	1.86146	1.74512	1.58647	1.55122	1.46958	0.324147	0.207806	0.0491583	0.0139034	-0.0677397		3930	2589	1697	1567
		30	34	2385	19.084	0.0019084	1628	3570	0.217	0.358	113.708	187.592	1.56205	0.542614	2.10466	67.3439	1.88982	1.7717	1.61064	1.57485	1.49196	0.327766	0.209653	0.0485891	0.0127971	-0.0700895		3930	2589	1703	1559
		30	35	2385	19.1847	0.00191847	1629	3570	0.213	0.356	111.026	185.565	1.52521	0.54793	2.07314	67.6292	1.8694	1.75256	1.59323	1.55783	1.47584	0.344186	0.227349	0.0680258	0.0326205	-0.0493705		3909	2603	1702	1565
		30	36	2385	19.2012	0.00192012	1629	3570	0.196	0.332	102.077	172.906	1.40227	0.521128	1.9234	67.9214	1.74186	1.633	1.48454	1.45155	1.37516	0.339597	0.23073	0.0822759	0.049286	-0.0271115		3930	2705	1700	1563
		28	32	2385	19.802	0.0019802	1628	3570	0.209	0.352	105.545	177.76	1.44991	0.531125	1.98104	67.7966	1.79077	1.67884	1.52622	1.49231	1.41376	0.340856	0.228933	0.0763111	0.0423951	-0.0361474		3930	2744	1694	1562
		27	32	2385	20.0803	0.00200803	1628	3570	0.21	0.355	104.58	176.79	1.43665	0.53122	1.96787	67.8776	1.781	1.66968	1.51789	1.48416	1.40605	0.344341	0.233029	0.0812394	0.0475084	-0.0306054		3930	2589	1691	1566
		24	28	2385	19.0042	0.00190042	1628	3570	0.202	0.336	106.292	176.803	1.46018	0.518146	1.97832	67.5241	1.78113	1.66981	1.51801	1.48427	1.40615	0.32095	0.20963	0.0578288	0.0240954	-0.0540243		3763	2767	1692	1571
		25	29	2385	20.1106	0.00201106	1628	3570	0.216	0.358	107.406	178.016	1.47548	0.518739	1.99422	67.4454	1.79334	1.68126	1.52842	1.49445	1.4158	0.317865	0.205781	0.0529395	0.0189747	-0.0596806		3965	2589	1697	1564
	p	30	36	2385	20.7361	0.00207361	1628	3570	0.149	0.296	71.8552	142.746	0.987102	0.525748	1.51285	71.2909	1.43803	1.34816	1.2256	1.19836	1.13529	0.450931	0.361054	0.238495	0.211259	0.148187		3930	2589	1689	1566
		30	38	2385	19.0476	0.00190476	1628	3570	0.115	0.232	60.375	121.8	0.829394	0.455806	1.2852	71.6049	1.22702	1.15033	1.04576	1.02252	0.968702	0.397628	0.320939	0.216364	0.193125	0.139308		3875	2589	1688	1565
		29	38	2385	19.4553	0.00194553	1628	3570	0.104	0.193	53.456	99.202	0.734345	0.338293	1.07264	69.8769	0.999368	0.936908	0.851734	0.832807	0.788975	0.265023	0.202563	0.117389	0.0984619	0.0546299		3870	2642	1696	1565
		29	36	2385	18.2899	0.00182899	1628	3570	0.147	0.285	80.3723	155.824	1.1041	0.559037	1.66314	70.7899	1.56978	1.47167	1.33788	1.30815	1.2393	0.465676	0.367565	0.233777	0.204046	0.135196		3930	2589	1697	1565	*
		28	29	2385	23.4192	0.00234192	1628	3570	0.163	0.343	69.601	146.461	0.956135	0.571159	1.52729	72.4546	1.47546	1.38324	1.25749	1.22955	1.16484	0.519324	0.427108	0.301358	0.273414	0.208701		3930	2589	1698	1556
		28	36	2385	17.5439	0.00175439	1628	3570	0.142	0.271	80.94	154.47	1.1119	0.544441	1.65634	70.4628	1.55614	1.45888	1.32626	1.29679	1.22853	0.444239	0.34698	0.214355	0.184882	0.11663		3845	2589	1695	1565
		27	29	2385	22.7144	0.00227144	1628	3570	0.169	0.351	74.4023	154.528	1.02209	0.595172	1.61726	72.1925	1.55672	1.45943	1.32675	1.29727	1.22899	0.534632	0.437337	0.304662	0.275178	0.206901		3898	2759	1699	1559
		33	32	2385	24.4499	0.00244499	1628	3570	0.163	0.325	66.667	132.925	0.915829	0.491458	1.40729	71.3658	1.3391	1.2554	1.14128	1.11591	1.05718	0.423267	0.339573	0.225446	0.200084	0.141352		3898	2589	1704	1562
		33	31	2385	23.9234	0.00239234	1628	3570	0.159	0.294	66.462	122.892	0.913013	0.41723	1.33024	69.8006	1.23802	1.16065	1.05513	1.03169	0.977387	0.32501	0.247633	0.14212	0.118673	0.0643733		3897	2656	1695	1554
		34	32	2385	24.5098	0.00245098	1628	3570	0.162	0.328	66.096	133.824	0.907985	0.502643	1.41063	71.6783	1.34815	1.26389	1.14899	1.12346	1.06433	0.440167	0.355908	0.241008	0.215475	0.156346		3930	2589	1702	1562	*
	q	31	38	2385	28.3688	0.00283688	1628	3570	0.177	0.31	62.3925	109.275	0.857109	0.345652	1.20276	68.6448	1.10084	1.03204	0.93822	0.91737	0.869088	0.243735	0.174933	0.0811106	0.0602613	0.0119786		3930	2589	1714	1537
		31	37	2385	28.0112	0.00280112	1628	3570	0.163	0.358	58.191	127.806	0.799392	0.517986	1.31738	73.3006	1.28753	1.20706	1.09732	1.07294	1.01647	0.488136	0.407665	0.297933	0.273548	0.217077		3907	2589	1688	1564
		30	37	2385	28.2087	0.00282087	1628	3570	0.174	0.352	61.683	124.784	0.847362	0.468289	1.31565	71.6612	1.25708	1.17852	1.07138	1.04757	0.992434	0.409721	0.331153	0.224015	0.200207	0.145072		3930	2539	1694	1551
		30	38	2385	28.9017	0.00289017	1628	3570	0.179	0.295	61.934	102.07	0.850811	0.294742	1.14555	67.3209	1.02826	0.963994	0.876359	0.856884	0.811785	0.17745	0.113184	0.0255481	0.00607345	-0.0390257		3917	2589	1728	1533
		29	37	2385	28.3172	0.00283172	1628	3570	0.175	0.351	61.8	123.953	0.84897	0.461112	1.31008	71.4868	1.24871	1.17067	1.06424	1.04059	0.985826	0.399743	0.321699	0.215274	0.191625	0.136856		3930	2527	1695	1562
		29	36	2385	28.1057	0.00281057	1628	3570	0.169	0.335	60.1302	119.193	0.826031	0.437992	1.26402	71.2463	1.20076	1.12571	1.02337	1.00063	0.947968	0.374728	0.299681	0.197343	0.174602	0.121937		3930	2589	1699	1556
		28	37	2385	28.4495	0.00284495	1628	3570	0.176	0.338	61.864	118.807	0.849849	0.421738	1.27159	70.5931	1.19687	1.12207	1.02006	0.997392	0.944898	0.347022	0.272217	0.170211	0.147543	0.0950489		3930	2541	1696	1555
		34	38	2385	26.5957	0.00265957	1628	3570	0.162	0.315	60.912	118.44	0.836771	0.426288	1.26306	70.8502	1.19317	1.1186	1.01691	0.994311	0.941979	0.356402	0.281829	0.180138	0.15754	0.105208		3930	2589	1704	1540
	r	32	32	2385	28.0112	0.00280112	1628	3570	0.305	0.591	108.885	210.987	1.49579	0.756479	2.25227	70.7784	2.1255	1.99265	1.8115	1.77125	1.67803	0.629705	0.496861	0.315711	0.275455	0.182231		3930	2589	1702	1565
		32	33	2385	27.4914	0.00274914	1628	3570	0.31	0.591	112.762	214.976	1.54906	0.756791	2.30585	70.441	2.16569	2.03033	1.84576	1.80474	1.70975	0.616626	0.481271	0.296695	0.255678	0.160692		3930	2589	1699	1565
		32	34	2385	28.7853	0.00287853	1628	3570	0.303	0.585	105.262	203.229	1.44603	0.725733	2.17176	70.7034	2.04734	1.91938	1.7449	1.70612	1.61632	0.601318	0.473359	0.298869	0.260094	0.170298		3930	2589	1700	1567
		32	35	2385	29.4464	0.00294464	1628	3570	0.296	0.571	100.522	193.912	1.3809	0.691804	2.07271	70.6858	1.95348	1.83139	1.6649	1.6279	1.54222	0.572577	0.450485	0.283995	0.246997	0.161318		3930	2589	1698	1576
		31	35	2385	28.9017	0.00289017	1628	3570	0.291	0.585	100.686	202.41	1.38316	0.75475	2.13791	71.5334	2.03909	1.91165	1.73786	1.69924	1.60981	0.655932	0.528489	0.354702	0.316083	0.226649		3930	2589	1696	1580
		31	34	2385	28.3286	0.00283286	1628	3570	0.314	0.571	110.842	201.563	1.52268	0.670221	2.1929	69.4478	2.03056	1.90365	1.73059	1.69213	1.60307	0.507883	0.380973	0.207913	0.169456	0.0803962		3930	2589	1704	1565
		31	32	2385	27.1444	0.00271444	1628	3570	0.307	0.575	113.099	211.83	1.55368	0.730432	2.28411	70.0707	2.13399	2.00062	1.81874	1.77833	1.68473	0.580311	0.446936	0.265062	0.224645	0.131049		3930	2589	1702	1565
		31	30	2385	26.2467	0.00262467	1628	3570	0.299	0.548	113.919	208.788	1.56495	0.701139	2.26609	69.6138	2.10335	1.97189	1.79262	1.75279	1.66054	0.538398	0.406939	0.227676	0.18784	0.0955883		3930	2589	1698	1565
		31	29	2385	25.3968	0.00253968	1628	3570	0.29	0.544	114.187	214.2	1.56864	0.739964	2.3086	70.1031	2.15787	2.023	1.83909	1.79822	1.70358	0.58923	0.454364	0.270455	0.229586	0.134943		3930	2589	1700	1565
		30	32	2385	27.1444	0.00271444	1628	3570	0.311	0.565	114.572	208.146	1.57392	0.691261	2.26519	69.4274	2.09688	1.96582	1.78711	1.7474	1.65543	0.522954	0.391899	0.213188	0.173475	0.0815063		3930	2589	1704	1570
	s	31	32	2385	23.0947	0.00230947	1628	3570	0.16	0.351	69.28	151.983	0.951725	0.61535	1.56708	73.2777	1.53109	1.43539	1.3049	1.27591	1.20875	0.579363	0.48367	0.353179	0.324181	0.257028		3930	2589	1688	1565
		30	30	2385	27.7316	0.00277316	1628	3570	0.155	0.349	55.893	125.849	0.767823	0.520881	1.2887	73.7844	1.26782	1.18858	1.08053	1.05651	1.00091	0.499993	0.420755	0.312702	0.28869	0.233084		3930	2589	1688	1565
		24	32	2385	30.581	0.0030581	1628	3570	0.147	0.256	48.069	83.712	0.660342	0.262699	0.923041	68.5225	0.843321	0.790613	0.718739	0.702767	0.66578	0.182979	0.130272	0.0583976	0.0424256	0.00543783		3930	2589	1688	1565
		23	32	2385	29.7619	0.00297619	1628	3570	0.116	0.179	38.976	60.144	0.535428	0.154582	0.69001	65.8572	0.605895	0.568027	0.516388	0.504913	0.478338	0.0704672	0.0325988	-0.01904	-0.0305153	-0.0570896		3930	2589	1688	1565
		19	36	2385	19.3798	0.00193798	1628	3570	0.113	0.218	58.308	112.488	0.800999	0.40135	1.20235	70.6874	1.13321	1.06239	0.965806	0.944344	0.894641	0.332214	0.261388	0.164807	0.143345	0.0936426		4002	2601	1688	1565
		43	20	2385	25.9067	0.00259067	1625	3570	0.129	0.192	49.794	74.112	0.684039	0.176896	0.860934	65.0407	0.74661	0.699947	0.636315	0.622175	0.589429	0.062571	0.0159079	-0.0477236	-0.061864	-0.09461		3930	2589	1692	1565
		44	22	2385	21.9298	0.00219298	1626	3570	0.157	0.3	71.592	136.8	0.983486	0.482848	1.46633	70.4887	1.37813	1.292	1.17455	1.14844	1.088	0.394647	0.308514	0.191059	0.164958	0.104514		3930	2589	1695	1565
		46	19	2385	22.5734	0.00225734	1627	3570	0.149	0.257	66.007	113.851	0.906763	0.35242	1.25918	68.3147	1.14694	1.07526	0.977509	0.955786	0.905482	0.240181	0.168497	0.0707458	0.0490233	-0.00128119		3930	2654	1693	1565
	u	32	25	2385	29.6736	0.00296736	1628	3570	0.186	0.427	62.682	143.899	0.861086	0.605029	1.46611	74.1577	1.44965	1.35905	1.2355	1.20804	1.14446	0.588563	0.49796	0.37441	0.346955	0.283374		3930	2589	1693	1575
		32	28	2385	25.4842	0.00254842	1628	3570	0.183	0.423	71.8092	165.985	0.98647	0.701687	1.68816	74.2887	1.67215	1.56764	1.42513	1.39346	1.32012	0.685677	0.581168	0.438656	0.406986	0.333646		3930	2589	1709	1571
		31	25	2385	29.2398	0.00292398	1628	3570	0.183	0.429	62.586	146.718	0.859767	0.627066	1.48683	74.5568	1.47805	1.38567	1.2597	1.23171	1.16688	0.618281	0.525903	0.399933	0.371939	0.307113		3930	2589	1698	1578
		31	23	2385	27.8164	0.00278164	1628	3570	0.19	0.423	68.305	152.069	0.938331	0.623496	1.56183	73.5652	1.53195	1.4362	1.30564	1.27662	1.20943	0.593618	0.497871	0.367307	0.338293	0.271102		3930	2589	1688	1565
		31	22	2385	28.3286	0.00283286	1628	3570	0.192	0.423	67.776	149.319	0.931064	0.606792	1.53786	73.3611	1.50425	1.41023	1.28203	1.25354	1.18757	0.573186	0.479171	0.350968	0.322478	0.256502		3930	2615	1700	1565
		30	22	2385	27.894	0.0027894	1628	3570	0.178	0.422	63.813	151.287	0.876623	0.652148	1.52877	74.7697	1.52408	1.42882	1.29893	1.27006	1.20322	0.647453	0.552199	0.422306	0.393441	0.326595		3907	2589	1695	1572
		30	24	2385	27.3224	0.00273224	1628	3570	0.18	0.422	65.88	154.452	0.905018	0.66016	1.56518	74.5583	1.55596	1.45871	1.3261	1.29663	1.22839	0.650943	0.553695	0.421085	0.391616	0.323372		3930	2589	1698	1579
		29	24	2385	27.3598	0.00273598	1628	3570	0.185	0.428	67.6175	156.434	0.928887	0.661769	1.59066	74.3056	1.57593	1.47743	1.34312	1.31327	1.24415	0.647041	0.548545	0.414233	0.384386	0.315267		3930	2589	1710	1571
		33	28	2385	25.7599	0.00257599	1628	3570	0.186	0.411	72.2052	159.55	0.99191	0.650021	1.64193	73.4191	1.60732	1.50686	1.36988	1.33943	1.26894	0.615411	0.514953	0.377966	0.347524	0.277027		3930	2589	1704	1565
		34	28	2385	26.6667	0.00266667	1628	3570	0.194	0.409	72.75	153.375	0.999394	0.599173	1.59857	72.492	1.54511	1.44854	1.31686	1.28759	1.21982	0.545717	0.449148	0.317462	0.288199	0.220431		3930	2589	1688	1565
		34	29	2385	27.1444	0.00271444	1628	3570	0.184	0.415	67.7856	152.886	0.931196	0.633669	1.56486	73.8171	1.54018	1.44392	1.31266	1.28349	1.21594	0.608989	0.512727	0.381461	0.352291	0.284739		3930	2589	1688	1565
		36	30	2385	24.0848	0.00240848	1628	3570	0.198	0.382	82.2096	158.606	1.12934	0.565927	1.69527	70.6884	1.59781	1.49795	1.36177	1.33151	1.26143	0.468469	0.368605	0.232428	0.202167	0.132087		3930	2589	1695	1567
	v	27	24	2385	26.1097	0.00261097	1628	3570	0.193	0.356	73.919	136.348	1.01545	0.461531	1.47698	69.7492	1.37358	1.28773	1.17066	1.14465	1.08441	0.358127	0.272278	0.155212	0.129197	0.0689522		3930	2589	1702	1565
		27	21	2385	25.9067	0.00259067	1628	3570	0.184	0.356	71.024	137.416	0.975683	0.491872	1.46755	70.7472	1.38434	1.29782	1.17983	1.15362	1.0929	0.408656	0.322135	0.204151	0.177933	0.117216		3930	2589	1698	1570
		26	21	2385	26.001	0.0026001	1628	3570	0.169	0.321	64.9974	123.457	0.892894	0.432763	1.32566	70.3639	1.24371	1.16598	1.05998	1.03643	0.981877	0.350817	0.273085	0.167087	0.143532	0.0889835		3945	2589	1694	1576
		26	23	2385	25.0627	0.00250627	1628	3570	0.179	0.334	71.421	133.266	0.981137	0.457462	1.4386	69.9916	1.34253	1.25862	1.1442	1.11878	1.05989	0.361395	0.277486	0.163066	0.137639	0.0787564		3911	2589	1701	1573
		26	24	2385	25.1004	0.00251004	1628	3570	0.187	0.353	74.5008	140.635	1.02345	0.489448	1.51289	70.2348	1.41677	1.32822	1.20747	1.18064	1.1185	0.393324	0.304776	0.184029	0.157196	0.0950568		3930	2589	1698	1567
		26	25	2385	25.9605	0.00259605	1628	3570	0.193	0.363	74.3436	139.828	1.02129	0.484555	1.50584	70.1585	1.40863	1.32059	1.20054	1.17386	1.11208	0.387348	0.299308	0.179254	0.152576	0.0907933		3930	2589	1703	1565
		26	26	2385	26.2055	0.00262055	1628	3570	0.19	0.359	72.504	136.994	0.996015	0.477301	1.47332	70.2544	1.38009	1.29384	1.17621	1.15008	1.08955	0.384077	0.297821	0.1802	0.154062	0.0935316		3930	2589	1707	1574
		25	24	2385	26.2881	0.00262881	1628	3570	0.188	0.363	71.5152	138.085	0.982431	0.493149	1.47558	70.7051	1.39108	1.30414	1.18558	1.15923	1.09822	0.40865	0.321707	0.203149	0.176803	0.11579		3907	2589	1698	1565
		25	19	2385	27.7008	0.00277008	1628	3570	0.194	0.392	70.034	141.512	0.962083	0.530435	1.49252	71.6374	1.4256	1.3365	1.215	1.188	1.12548	0.463519	0.374419	0.252919	0.225919	0.163392		3930	2589	1703	1565
	w	31	39	2385	37.037	0.0037037	1628	3570	0.169	0.373	45.63	100.71	0.626836	0.409892	1.03673	73.3963	1.01456	0.95115	0.864682	0.845467	0.800968	0.387724	0.324314	0.237845	0.21863	0.174132		3930	2589	1697	1573
		30	39	2385	36.7816	0.00367816	1628	3570	0.182	0.373	49.4813	101.409	0.679742	0.385548	1.06529	71.9244	1.02161	0.957755	0.870687	0.851338	0.806531	0.341863	0.278013	0.190944	0.171596	0.126788		3930	2589	1701	1571
		30	40	2385	38.7597	0.00387597	1628	3570	0.177	0.382	45.666	98.556	0.627331	0.39334	1.02067	72.9565	0.99286	0.930807	0.846188	0.827384	0.783837	0.36553	0.303476	0.218857	0.200053	0.156506		3930	2589	1697	1570
		29	40	2385	37.1747	0.00371747	1628	3570	0.202	0.524	54.338	140.956	0.746461	0.646982	1.39344	76.4294	1.42	1.33125	1.21023	1.18333	1.12105	0.67354	0.58479	0.463767	0.436873	0.374592		3930	2589	1697	1567
		29	39	2385	38.0518	0.00380518	1628	3570	0.191	0.398	50.1948	104.594	0.689545	0.404124	1.09367	72.2585	1.05369	0.987836	0.898033	0.878076	0.831862	0.364147	0.298291	0.208488	0.188532	0.142317		3930	2589	1699	1574
		28	40	2385	37.4532	0.00374532	1628	3570	0.185	0.39	49.395	104.13	0.678558	0.406768	1.08533	72.4907	1.04901	0.98345	0.894045	0.874178	0.828168	0.370456	0.304892	0.215488	0.19562	0.149611		3930	2589	1700	1572
		28	41	2385	37.4532	0.00374532	1628	3570	0.187	0.377	49.929	100.659	0.685893	0.376434	1.06233	71.5913	1.01405	0.950668	0.864244	0.845039	0.800563	0.328153	0.264775	0.178351	0.159145	0.114669		3930	2589	1699	1569
		34	20	2385	17.5439	0.00175439	1628	3570	0.156	0.292	88.92	166.44	1.22153	0.573491	1.79502	70.0576	1.67673	1.57193	1.42903	1.39727	1.32373	0.455202	0.350406	0.207503	0.175747	0.102206		3930	2712	1699	1573

## Sheet: 250+ dense data
													Avg H2Om wt% (all)	Avg OH wt% (all)	Avg H2Ot wt% (all)
													0.244014	0.422727	0.666741
													stdev H2Om (all)	stdev OH (all)	stdev H2Ot (all)
													0.0480657	0.0781984	0.114665
													Conventional method	Species dependent ε3500 method			Conventional method 1630 & 3500 bands
													Newman et al 1986	Newman et al 1986 values			Fixed ε3500 values from literature					Fixed ε3500 OH-by-difference
													ε1630	ε3500OH	ε3500H2Om		Okumura	Ihinger	Dobson	Hauri	Aubaud	Okumura	Ihinger	Dobson	Hauri	Aubaud
													55	100	56		75	80	88	90	95	75	80	88	90	95
					From reflectance		Peak Positions		Measured absorbances		Normalised absorbances (1/cm)																	3500 H2Ot baseline positions		1630 H2Om baseline positions
Data set	Shard	Row	Col	Density (g/L)	Thickness (µm)	Thickness (cm)	1630 H2Om	3500 H2Ot	1630 H2Om	3500 H2Ot	Norm 1630 H2Om	Norm 3500 H2Ot	H2Om wt% (1630)	Calc OH wt%	Calc H2Ot wt%	Calc ε3500	H2Ot wt%	H2Ot wt%	H2Ot wt%	H2Ot wt%	H2Ot wt%	OH wt%	OH wt%	OH wt%	OH wt%	OH wt%		left	right	left	right	*indicates flexicurve baseline used for 1630 H2Om peak
250+ micron dense clast
	a	32	41	2403	18.622	0.0018622	1628	3570	0.035	0.141	18.795	75.717	0.25626	0.424293	0.680553	83.432	0.757065	0.709748	0.645226	0.630887	0.597683	0.500805	0.453489	0.388966	0.374628	0.341423		3884	2589	1695	1561
		32	42	2403	18.5701	0.00185701	1628	3570	0.035	0.129	18.8475	69.4665	0.256976	0.37702	0.633996	82.1656	0.694569	0.651158	0.591962	0.578807	0.548344	0.437593	0.394182	0.334986	0.321831	0.291368		3799	2589	1695	1561
		31	41	2403	18.0766	0.00180766	1628	3570	0.036	0.136	19.9152	75.2352	0.271533	0.412127	0.68366	82.5243	0.752248	0.705232	0.64112	0.626873	0.59388	0.480714	0.433699	0.369587	0.35534	0.322346		3930	2589	1696	1526
		29	44	2403	18.2482	0.00182482	1628	3570	0.024	0.09	13.152	49.32	0.179321	0.269429	0.44875	82.4176	0.493132	0.462311	0.420283	0.410943	0.389314	0.313811	0.28299	0.240962	0.231622	0.209994		3786	2589	1688	1553
		24	36	2403	21.561	0.0021561	1628	3570	0.039	0.183	18.0882	84.8754	0.246623	0.498368	0.744991	85.4342	0.848636	0.795596	0.72327	0.707197	0.669976	0.602013	0.548973	0.476646	0.460574	0.423353		3930	2655	1688	1562	*
		27	40	2403	18.018	0.0018018	1628	3570	0.04	0.153	22.2	84.915	0.302685	0.46727	0.769956	82.7027	0.849032	0.795968	0.723607	0.707527	0.670289	0.546347	0.493282	0.420922	0.404842	0.367603		3930	2619	1688	1545
		35	43	2403	21.1238	0.00211238	1632	3570	0.033	0.133	15.6222	62.9622	0.213	0.352871	0.565871	83.4379	0.629535	0.590189	0.536535	0.524612	0.497001	0.416534	0.377188	0.323535	0.311612	0.284001		3782	2677	1688	1565
		36	42	2403	20.3252	0.00203252	1631	3570	0.035	0.131	17.22	64.452	0.234786	0.351843	0.586629	82.3899	0.644431	0.604154	0.549231	0.537025	0.508761	0.409645	0.369368	0.314445	0.30224	0.273975		3797	2548	1696	1565
	b	32	29	2403	25.3807	0.00253807	1628	3570	0.057	0.222	22.458	87.468	0.306203	0.484445	0.790648	82.9596	0.874559	0.819899	0.745363	0.728799	0.690441	0.568356	0.513696	0.43916	0.422596	0.384238		3930	2589	1688	1565	*
		29	29	2403	26.455	0.0026455	1628	3570	0.036	0.19	13.608	71.82	0.185538	0.434674	0.620212	86.8373	0.7181	0.673219	0.612017	0.598417	0.566921	0.532562	0.487681	0.426479	0.412879	0.381383		3867	2589	1668	1565	*
		26	25	2403	24.8756	0.00248756	1628	3570	0.019	0.134	7.638	53.868	0.10414	0.345636	0.449776	89.8123	0.538605	0.504942	0.459039	0.448838	0.425215	0.434465	0.400802	0.354898	0.344698	0.321075		3911	2589	1676	1559	*
		32	32	2403	11.6279	0.00116279	1628	3570	0.024	0.099	20.64	85.14	0.281416	0.480869	0.762284	83.7563	0.851282	0.798077	0.725524	0.709402	0.672065	0.569866	0.516661	0.444109	0.427986	0.390649		3930	2572	1695	1563
		32	33	2403	11.2423	0.00112423	1628	3570	0.022	0.095	19.569	84.5025	0.266813	0.484266	0.751079	84.3694	0.844908	0.792101	0.720092	0.70409	0.667032	0.578095	0.525288	0.453279	0.437277	0.400219		3907	2612	1698	1553
		31	33	2403	11.274	0.0011274	1628	3570	0.023	0.105	20.401	93.135	0.278157	0.542648	0.820805	85.0891	0.931221	0.87302	0.793654	0.776017	0.735174	0.653064	0.594863	0.515497	0.49786	0.457017		3930	2589	1696	1557
		31	32	2403	11.6347	0.00116347	1628	3570	0.023	0.108	19.7685	92.826	0.269533	0.54516	0.814693	85.443	0.928131	0.870123	0.791021	0.773443	0.732735	0.658598	0.60059	0.521488	0.50391	0.463202		3930	2589	1696	1561
		30	29	2403	11.976	0.0011976	1628	3570	0.023	0.091	19.205	75.985	0.26185	0.423172	0.685022	83.181	0.759745	0.712261	0.64751	0.63312	0.599798	0.497895	0.450411	0.38566	0.37127	0.337948		3930	2589	1696	1561
		30	31	2403	11.554	0.0011554	1633	3570	0.022	0.096	19.041	83.088	0.259614	0.47769	0.737304	84.507	0.830765	0.778842	0.708038	0.692304	0.655867	0.571151	0.519228	0.448424	0.43269	0.396253		3930	2589	1690	1565
		30	34	2403	15.015	0.0015015	1628	3570	0.024	0.092	15.984	61.272	0.217933	0.337434	0.555367	82.7338	0.612635	0.574345	0.522132	0.510529	0.483659	0.394702	0.356412	0.304199	0.292596	0.265726		3930	2589	1688	1561
		28	34	2403	14.5349	0.00145349	1628	3570	0.026	0.089	17.888	61.232	0.243893	0.322596	0.566489	81.0565	0.612235	0.57397	0.521791	0.510196	0.483343	0.368342	0.330077	0.277898	0.266302	0.23945		3930	2589	1694	1565	*

## Sheet: 250+ pumice data
													Avg H2Om wt% (all)	Avg OH wt% (all)	Avg H2Ot wt% (all)
													1.13753	0.347835	1.48536
													stdev H2Om (all)	stdev OH (all)	stdev H2Ot (all)
													0.393114	0.238073	0.504761
													Conventional method	Species dependent ε3500 method			Conventional method 1630 & 3500 bands
													Newman et al 1986	Newman et al 1986 values			Fixed ε3500 values from literature					Fixed ε3500 OH-by-difference
													ε1630	ε3500OH	ε3500H2Om		Okumura	Ihinger	Dobson	Hauri	Aubaud	Okumura	Ihinger	Dobson	Hauri	Aubaud
													55	100	56		75	80	88	90	95	75	80	88	90	95
					From reflectance		Peak Positions		Measured absorbances		Normalised absorbances (1/cm)																	3500 H2Ot baseline positions		1630 H2Om baseline positions
Data set	Shard	Row	Col	Density (g/L)	Thickness (µm)	Thickness (cm)	1630 H2Om	3500 H2Ot	1630 H2Om	3500 H2Ot	Norm 1630 H2Om	Norm 3500 H2Ot	H2Om wt% (1630)	Calc OH wt%	Calc H2Ot wt%	Calc ε3500	H2Ot wt%	H2Ot wt%	H2Ot wt%	H2Ot wt%	H2Ot wt%	OH wt%	OH wt%	OH wt%	OH wt%	OH wt%		left	right	left	right	*indicates flexicurve baseline used for 1630 H2Om peak
250+ micron pumice clast
	a	32	19	2388	10.4822	0.00104822	1626	3570	0.112	0.15	106.848	143.1	1.46597	0.2589	1.72487	62.6043	1.43979	1.3498	1.22709	1.19982	1.13668	-0.026178	-0.116165	-0.238874	-0.266143	-0.329291		3763	2749	1695	1554
		34	16	2388	9.33707	0.000933707	1624	3570	0.085	0.12	91.035	128.52	1.24901	0.270374	1.51938	63.8298	1.29309	1.21228	1.10207	1.07758	1.02086	0.0440827	-0.0367356	-0.146942	-0.171433	-0.228147		3901	2858	1688	1561
		35	16	2388	9.0212	0.00090212	1625	3570	0.1	0.138	110.85	152.973	1.52087	0.302654	1.82353	63.3028	1.53913	1.44293	1.31175	1.2826	1.2151	0.0182505	-0.0779448	-0.20912	-0.23827	-0.305776		3920	2772	1688	1565
		36	15	2388	8.77193	0.000877193	1624	3570	0.085	0.124	96.9	141.36	1.32948	0.322203	1.65168	64.5833	1.42228	1.33339	1.21217	1.18524	1.12285	0.0928029	0.00391023	-0.117307	-0.144244	-0.206625		3716	3000	1688	1565
		36	16	2388	8.83002	0.000883002	1626	3570	0.098	0.13	110.985	147.225	1.52273	0.258242	1.78097	62.38	1.48129	1.38871	1.26247	1.23441	1.16944	-0.0414347	-0.134016	-0.260262	-0.288317	-0.353286		3930	2736	1688	1565
		37	15	2388	8.68056	0.000868056	1625	3570	0.071	0.108	81.792	124.416	1.1222	0.310421	1.43262	65.534	1.2518	1.17356	1.06688	1.04317	0.988264	0.129606	0.0513681	-0.0553195	-0.0790279	-0.133931		3764	2741	1679	1580
		45	44	2388	17.8492	0.00178492	1625	3570	0.061	0.113	34.1752	63.3083	0.468888	0.215151	0.684039	69.8393	0.636971	0.59716	0.542873	0.530809	0.502872	0.168082	0.128272	0.0739844	0.0619206	0.0339833		3846	2234	1685	1587
		46	44	2388	17.5131	0.00175131	1626	3570	0.085	0.177	48.535	101.067	0.665906	0.389751	1.05566	72.2449	1.01688	0.953323	0.866657	0.847398	0.802798	0.350972	0.287417	0.200751	0.181492	0.136892		3930	2589	1681	1589
		46	43	2388	17.5208	0.00175208	1626	3570	0.084	0.174	47.943	99.3105	0.657784	0.381045	1.03883	72.1393	0.999204	0.936754	0.851595	0.83267	0.788846	0.341421	0.278971	0.193811	0.174887	0.131062		3930	2589	1682	1579
		46	42	2388	17.5439	0.00175439	1625	3570	0.064	0.109	36.48	62.13	0.50051	0.188551	0.689061	68.04	0.625116	0.586046	0.532769	0.52093	0.493513	0.124606	0.0855363	0.0322594	0.0204201	-0.00699726		3960	2589	1683	1587
		47	42	2388	17.7069	0.00177069	1628	3570	0.085	0.162	48.0038	91.4895	0.658617	0.32156	0.980177	70.4348	0.920514	0.862982	0.784529	0.767095	0.726722	0.261897	0.204365	0.125912	0.108478	0.0681047		3930	2589	1688	1571	*
		47	43	2388	17.2936	0.00172936	1628	3570	0.095	0.17	54.9338	98.3025	0.753697	0.319726	1.07342	69.1057	0.989063	0.927246	0.842951	0.824219	0.780839	0.235365	0.173549	0.0892536	0.0705214	0.0271415		3939	2490	1682	1570
	b	19	36	2388	5.83771	0.000583771	1626	3570	0.078	0.145	133.614	248.385	1.8332	0.847737	2.68094	69.9132	2.49911	2.34291	2.12992	2.08259	1.97298	0.665906	0.509712	0.29672	0.249388	0.139778		3770	2589	1694	1565	*
		19	35	2388	5.8072	0.00058072	1621	3570	0.04	0.056	68.88	96.432	0.945042	0.198459	1.1435	63.6364	0.970243	0.909603	0.826911	0.808536	0.765981	0.0252011	-0.0354391	-0.11813	-0.136506	-0.179061		3788	2859	1667	1561
		20	36	2388	6.98812	0.000698812	1625	3570	0.076	0.141	108.756	201.771	1.49214	0.686976	2.17912	69.8712	2.0301	1.90322	1.7302	1.69175	1.60271	0.537958	0.411076	0.238056	0.199607	0.110568		3811	2468	1688	1563
	d	29	34	2388	8.59107	0.000859107	1623	3570	0.057	0.078	66.348	90.792	0.910302	0.175353	1.08566	63.1068	0.913496	0.856403	0.778548	0.761247	0.721181	0.00319404	-0.0538995	-0.131754	-0.149055	-0.189121		3774	2853	1670	1570
	e	41	22	2388	16.5631	0.00165631	1628	3570	0.134	0.204	80.9025	123.165	1.10999	0.307816	1.41781	65.5527	1.23921	1.16176	1.05615	1.03268	0.978327	0.129223	0.051772	-0.0538429	-0.0773129	-0.131664		3915	2589	1688	1565
		40	22	2388	16.6875	0.00166875	1628	3570	0.12	0.239	71.91	143.221	0.986614	0.528249	1.51486	71.3433	1.441	1.35094	1.22813	1.20084	1.13763	0.45439	0.364328	0.241515	0.214223	0.151021		3930	2589	1693	1568
		39	21	2388	16.8138	0.00168138	1628	3570	0.144	0.327	85.644	194.483	1.17505	0.809557	1.9846	73.9484	1.95678	1.83448	1.66771	1.63065	1.54482	0.781732	0.659433	0.492662	0.455602	0.369779		3930	2589	1688	1574	*
		39	20	2388	16.4474	0.00164474	1628	3570	0.145	0.33	88.16	200.64	1.20957	0.836686	2.04625	73.991	2.01872	1.89255	1.7205	1.68227	1.59373	0.809158	0.682987	0.510937	0.472704	0.384163		3857	2589	1688	1565
		38	20	2388	16.8919	0.00168919	1628	3570	0.13	0.316	76.96	187.072	1.0559	0.820353	1.87625	75.2381	1.88221	1.76457	1.60416	1.56851	1.48595	0.82631	0.708671	0.548256	0.512608	0.430055		3930	2589	1688	1565
		25	45	2388	8.05153	0.000805153	1627	3570	0.081	0.098	100.602	121.716	1.38027	0.145525	1.5258	60.1966	1.22464	1.1481	1.04372	1.02053	0.966818	-0.155636	-0.232175	-0.336548	-0.359741	-0.413454		3846	2693	1688	1560
		23	44	2388	7.54148	0.000754148	1626	3570	0.096	0.116	127.296	153.816	1.74652	0.182656	1.92917	60.166	1.54761	1.45088	1.31898	1.28967	1.2218	-0.198909	-0.295634	-0.427533	-0.456843	-0.524721		3930	2621	1695	1561
		22	45	2388	7.24638	0.000724638	1627	3570	0.087	0.124	120.06	171.12	1.64724	0.36883	2.01607	64.0496	1.72171	1.6141	1.46737	1.43476	1.35924	0.0744728	-0.0331341	-0.179871	-0.212479	-0.287992		3930	2589	1696	1557
		22	46	2388	6.58762	0.000658762	1627	3570	0.074	0.088	112.332	133.584	1.54121	0.144957	1.68616	59.7826	1.34404	1.26004	1.14549	1.12004	1.06109	-0.197164	-0.281166	-0.395716	-0.421171	-0.48012		3787	2719	1688	1562
		20	47	2388	7.45712	0.000745712	1626	3570	0.083	0.118	111.303	158.238	1.52709	0.338904	1.86599	63.9913	1.5921	1.49259	1.3569	1.32675	1.25692	0.0650087	-0.0344975	-0.170188	-0.200341	-0.27017		3789	2589	1695	1545
	f	33	36	2388	18.8324	0.00188324	1628	3570	0.128	0.154	67.968	81.774	0.932529	0.0948557	1.02738	60.0624	0.822762	0.77134	0.701218	0.685635	0.649549	-0.109766	-0.161189	-0.231311	-0.246893	-0.28298		3930	2589	1694	1553
		23	29	2388	21.164	0.0021164	1627	3570	0.077	0.109	36.3825	51.5025	0.499172	0.109105	0.608277	63.8921	0.518188	0.485801	0.441638	0.431823	0.409096	0.0190161	-0.0133707	-0.0575344	-0.0673486	-0.0900762		3930	2589	1695	1565
	g	9	48	2388	8.25083	0.000825083	1627	3570	0.065	0.061	78.78	73.932	1.08087	-0.047392	1.03348	53.9823	0.743861	0.697369	0.633972	0.619884	0.587259	-0.33701	-0.383501	-0.446898	-0.460987	-0.493612		3931	2712	1688	1560	*
